# Supplementary material for: mRNA vaccines in disease prevention and treatment
Source: Springer Nature journal article supplement (doi:10.1038/s41392-023-01579-1), 2023-09-20
Supplement: MOESM1 [file 41392_2023_1579_MOESM1_ESM.pdf]

15890172\_MS-R2.docx

## 1 Abstract

2 mRNA vaccines have emerged as highly effective strategies in the prophylaxis and  
3 treatment of diseases, thanks largely although not totally to their extraordinary  
4 performance in recent years against the worldwide plague COVID-19. The huge  
5 superiority of mRNA vaccines regarding their efficacy, safety, and large-scale  
6 manufacture encourages pharmaceutical industries and biotechnology companies to  
7 expand their application to a diverse array of diseases, despite the nonnegligible  
8 problems in design, fabrication, and mode of administration. This review delves into  
9 <sup>7</sup> the technical underpinnings of mRNA vaccines, covering mRNA design, synthesis,  
10 delivery, and adjuvant technologies. Moreover, this review presents a systematic  
11 retrospective analysis in a logical and well-organized manner, shedding light on  
12 representative mRNA vaccines employed in various diseases. The scope extends across  
13 infectious diseases, cancers, immunological diseases, tissue damages, and rare diseases,  
14 showcasing the versatility and potential of mRNA vaccines in diverse therapeutic areas.  
15 Furthermore, this review engages in a prospective discussion regarding the current  
16 challenge and potential direction for the advancement and utilization of mRNA  
17 vaccines. Overall, this comprehensive review <sup>157</sup> serves as a valuable resource for  
18 researchers, clinicians, and industry professionals, providing a comprehensive  
19 understanding of the technical aspects, historical context, and future prospects <sup>21</sup> of  
20 mRNA vaccines in the fight against various diseases.

21

## 22 Keywords

23 mRNA vaccine, disease prevention, disease treatment, infectious disease, cancer,  
24 immunological disease, tissue injury, rare disease

## 1. Introduction

Vaccines have proven remarkable efficacy in preventing the spread of infectious diseases, causing the preservation of countless lives annually<sup>1,2</sup>. The extensive implementation of vaccines in recent decades has led to the elimination of smallpox and an extremely low incidence of polio, measles, and other infectious diseases<sup>3</sup>. The World Health Organization reports that vaccination prevents approximately 2 million mortalities from measles, influenza, pertussis, and tetanus every year<sup>4</sup>. However, traditional vaccines are not always effective against most dangerous pathogens that have the ability to evade immune surveillance, and there are obstacles to large-scale and rapid production of such traditional vaccines for emerging diseases<sup>1,2</sup>. Moreover, the use of vaccines in cancer management shows potent efficacy in preclinical trials, becoming one of the most promising treatments in the field of immune oncology and gaining more attention than ever. Conventional vaccines have several disadvantages that may limit their application in disease prevention and treatment. For instance, the underlying procedure for the development of dendritic cell (DC) vaccines involves a labour-intensive and time-consuming process that necessitates the preparation of patient-autologous cells. The engineering and fabrication of microorganism-based vaccines entail intricate and complex processes. Peptide vaccines exhibit MHC restriction, selectively activating monoclonal T cells, thus having a high risk of immune escape<sup>5</sup>. DNA vaccines have risks of genomic alteration, long-term expression, and generation of anti-DNA autoantibodies that might impede their utilisation in humans<sup>6,7</sup>. Therefore, it is essential to select a suitable vaccine format with promising value for disease prevention and treatment.

Vaccines using messenger RNA (mRNA), a single nucleotide sequence that functions as a template for protein translation, possess multiple beneficial features over traditional vaccines

3,8. Indeed, mRNA vaccines use the body cell as the core facility for a natural induction of both innate and adaptive immunity (**Figure 1**), enabling posttranslational modification and full functionality of protein products, allowing the correct translation folding and assembly in the host cells of multimeric and versatile proteins that cannot be produced in bioreactors, and allowing the transfer of the produced intracellular and transmembrane proteins to their suitable cellular locations <sup>9-14</sup>. mRNA vaccines can be designed to encode any antigen based on the unique attributes of diseases. Moreover, compared with DNA vaccines, mRNA vaccines avoid <sup>77</sup> the potential risk of insertional mutagenesis in the host genome and cause adjustable expression of the selected antigen <sup>15-17</sup>. From the commercial point of view, the mRNA vaccine allows rapid development and large-scale production through a cell-free process due to the highly productive transcription reaction *in vitro*, which is also extremely cost-effective <sup>1,3,7,15-17</sup>. Notably, although mRNA itself also has several disadvantages compared with other vaccine modalities (e.g., poor stability and potent immunogenicity that limit the usage of mRNA vaccines *in vivo*), improvements in modifications and delivery largely address these obstacles, ensuring the maintenance of *in vivo* stability as well as the balance between the initiation of a robust immune responses and irreversible adverse reactions caused by lasting function <sup>1,3,7,12,15-20</sup>. For all these reasons, mRNA vaccines have emerged as a promising modality in the prevention and treatment of a number of diseases.

This comprehensive review provides an in-depth exploration of the technical foundations of mRNA vaccine, encompassing essential aspects such as mRNA design, synthesis, delivery, and adjuvant technologies. This comprehensive review presents a methodical and structured analysis of representative mRNA vaccines used in a diverse array of medical conditions, including infectious diseases, cancers, immunological diseases, tissue damages, and rare diseases. Furthermore, this review includes a forwards-looking discourse on the current



75 obstacles and potential possibilities <sup>1</sup> in the development and implementation of mRNA vaccines.

76

## 77 **2 mRNA vaccine development**

78 <sup>79</sup> The development of mRNA vaccines is the culmination of extensive research spanning several  
79 decades. The discovery of mRNA dates back to 1961, and its isolation for *in vitro* protein  
80 expression was first achieved in 1969 <sup>21,22</sup>. In 1990, <sup>11</sup> *in vitro* transcribed mRNA was successfully  
81 validated as a template for synthesizing proteins in mouse skeletal muscle cells *in vivo*, marking  
82 a breakthrough in *in vivo* mRNA expression and laying the groundwork for the development of  
83 mRNA vaccines <sup>23</sup>. In 1992, vasopressin mRNA was injected into the hypothalamus,  
84 successfully expressed, and yielded physiological responses <sup>24</sup>. Subsequently, in 1993 and 1995,  
85 mRNA was found to elicit both innate and adaptive immunity <sup>25-27</sup>. Despite these promising  
86 findings, the development of mRNA vaccines initially faced limited investment, mainly owing  
87 to concerns over their instability, inefficient *in vivo* transportation, and possible innate  
88 immunogenicity. However, due to their safety, straightforward design, and simplicity of  
89 manufacturing, research on mRNA has persevered. Ultimately, this persistence paid off, as  
90 evidenced by <sup>144</sup> the development of highly effective mRNA vaccines against COVID-19, which  
91 have played a pivotal role in the ongoing efforts to control the pandemic. To date, a  
92 comprehensive framework <sup>26</sup> has been established for the development of mRNA vaccines,  
93 including design, synthesis, and delivery technologies (**Figure 2**).

94

### 95 **2.1 mRNA design**

96 The advancement of mRNA vaccines faced a major obstacle owing to the instability of mRNAs  
97 and poor translational efficiencies <sup>4,28</sup>. *In vitro*, transcribed mRNA comprises five primary  
98 elements, namely, the <sup>9</sup> 5' cap, 5' untranslated region (UTR), an open reading frame (ORF), 3'  
99 UTR, and a poly(A) tail, all of which simulate the structure of an endogenous mRNA <sup>4,28</sup>. To

100 enhance mRNA translational efficacy, scientists have devised various techniques to modify  
101 each of these components and optimize mRNA design.

102

103 The 5' cap, a modified nucleotide structure situated at the 5' end of the mature mRNA molecule,  
104 comprises a guanine nucleotide linked to the mRNA via a triphosphate linkage, with additional  
105 methylations at the 7th position of the guanine and/or the 2' position of the first transcribed  
106 nucleotide <sup>29,30</sup>. It has vital roles in several aspects of mRNA stability and functions, including  
107 protection against exonucleases, enhancement of mRNA translation efficiency, and facilitation  
108 of transport from the nucleus to the cytoplasm <sup>4,31</sup>. In mRNA vaccines, the inclusion of a 5' cap  
109 structure is critical for the stabilization of mRNA molecules and the promotion of efficient  
110 translation to the encoded protein. Notably, the 5' cap modification, particularly the m7G cap,  
111 boosts mRNA translational efficiency by facilitating its recognition by the translation initiation  
112 complex <sup>4,32</sup>. Furthermore, prior researches have highlighted the capability of the m7G cap to  
113 protect mRNA from nucleases, thereby enhancing its stability and immunogenicity.

114

115 The poly(A) tail is a critical posttranscriptional modification of mRNA that significantly  
116 contributes to its stability, export, and translation. In eukaryotic cells, the process of mRNA  
117 maturation involves the addition of a long chain of adenine nucleotides at the 3' end of the  
118 mRNA molecule, with a typical length ranging from 50–250 nucleotides <sup>31,33</sup>. A key function  
119 of the poly(A) tail is to safeguard mRNA from exonucleases, which are enzymes that can  
120 degrade RNA from its ends <sup>29,31</sup>. Additionally, the poly(A) tail facilitates the export of mRNA  
121 from the nucleus to the cytoplasm, wherein it can be translated into proteins <sup>34-36</sup>. Furthermore,  
122 the poly(A) tail is involved in the initiation of protein synthesis <sup>34-36</sup>. It interacts with poly(A)-  
123 binding protein, which recruits the ribosome to the mRNA, thus promoting efficient translation  
124 <sup>34-36</sup>. The introduction of the poly(A) tail in mRNA vaccines serves two critical purposes. First,

125 it stabilizes the mRNA molecule and protects it from degradation by cellular enzymes. Second,  
126 it enhances the mRNA's translation efficiency, leading to increased expression of the antigen  
127 and a more potent immune response. <sup>9</sup> The length of the poly(A) tail in mRNA vaccines is  
128 meticulously optimized <sup>19</sup> to balance mRNA stability and translation efficiency.

129  
130 <sup>7</sup> The UTRs of mRNA play a crucial role in the regulation of gene expression <sup>31,32</sup>. Located at the  
131 <sup>114</sup> 5' and 3' ends, these regions are involved in the control of mRNA stability, translation efficiency,  
132 and subcellular localization, thereby regulating the production and function of the  
133 corresponding protein <sup>4</sup>. The coding sequence of mRNA determines the protein sequence, while  
134 the UTRs regulate its expression. Specifically, <sup>68</sup> the 5' UTR plays critical roles in regulating  
135 mRNA <sup>68</sup> stability and translational efficiency, with modifications to the 5' cap structure and  
136 length of the 5' UTR enhancing the two <sup>28,37</sup>. Alternative splicing of the 5' UTR can alter the  
137 translational efficiency of mRNA <sup>37</sup>. Similarly, the 3' UTR regulates mRNA stability through  
138 the binding of regulatory proteins and microRNAs, which can either destabilize or stabilize  
139 mRNA. Modifying the 3' UTR, for instance, by adding poly(A) tails, can enhance mRNA  
140 stability and protein expression. In mRNA vaccine design, UTRs are meticulously engineered  
141 to optimize protein expression and immune responses <sup>29</sup>. The 5' UTR can be modified to  
142 enhance translation efficiency, while the 3' UTR can be modified to stabilize mRNA and  
143 prolong protein expression, resulting in improved immunogenicity and efficacy of mRNA  
144 vaccines <sup>37</sup>.

145  
146 <sup>126</sup> The ORF, beginning with a start codon and ending with a stop codon, is a critical segment of  
147 mRNA translated into a protein by the ribosome <sup>4,28</sup>. The length of the ORF can vary from a  
148 few hundred to several thousand nucleotides <sup>38,39</sup>. The sequence of the ORF is responsible for  
149 determining the identity and structure of the protein synthesized, thus playing a pivotal role in

150 the effectiveness of mRNA <sup>38,39</sup>. In the context of mRNA vaccines, the importance of ORF  
151 design is paramount, as it directly affects the production of the target antigen. Advances in  
152 mRNA vaccine technology have facilitated their rapid design and production against emerging  
153 infectious diseases. ORF sequences <sup>141</sup> have been optimized to enhance mRNA stability and  
154 translation efficiency. One such approach involves optimizing the codon usage of the ORF,  
155 thereby improving translation efficiency and reducing premature termination <sup>4,28,40</sup>. Another  
156 strategy involves incorporating specific RNA modifications, including a pseudouridine, to  
157 enhance the stability and accuracy of mRNA translation <sup>4,16,28,41</sup>. Additionally, the use of  
158 nonnatural amino acids in the ORF can expand the epitope repertoire presented by the antigen,  
159 thereby potentially inducing a broader immune response. The development of efficient and  
160 effective ORF design strategies is vital for the success of mRNA vaccines. These endeavors are  
161 expected to result in <sup>9</sup> the development of more potent and versatile mRNA vaccines with broad  
162 application prospects for disease prevention and treatment.

163

164 Notably, modified nucleosides have gained widespread popularity within mRNA technology  
165 owing to their ability to enhance <sup>11</sup> the stability, translational efficiency, and immunogenicity of  
166 mRNA molecules <sup>42-44</sup>. These nucleoside analogs can be integrated into the mRNA sequence in  
167 *in vitro* transcription, resulting in the formation of modified mRNA molecules with superior  
168 properties relative to their unmodified counterparts. Among the most frequently employed  
169 modified nucleosides in mRNA are pseudouridine, 5-methylcytidine, and 2-thiouridine <sup>42-45</sup>.  
170 Pseudouridine improves mRNA stability and translational efficiency while reducing the  
171 activation of innate immune responses <sup>45</sup>. 5-Methylcytidine elevates protein expression levels,  
172 while 2-thiouridine enhances the precision of translation by increasing the binding affinity  
173 between mRNA and ribosomes <sup>45</sup>. Other modifications, including N1-methylpseudouridine and  
174 5-methoxyuridine, have also been utilized <sup>19</sup> to improve mRNA stability and translation efficiency

175 <sup>45</sup>. The incorporation of modified nucleosides in mRNA technology holds considerable promise  
176 for the development of more effective and safer mRNA-based therapeutics, including vaccines  
177 and gene therapies for a wide range of human diseases.

178

## 179 **2.2 mRNA vaccine synthesis**

180 The production of mRNA by *in vitro* transcription involves the use of RNA polymerase  
181 enzymes for synthesizing mRNA from a DNA template outside a living cell. The upstream  
182 process entails using a plasmid as a template and transcribing it into primary mRNA using T7,  
183 SP6, or T3 RNA polymerase <sup>3</sup>. This reaction takes only a few hours and yields a few milligrams  
184 of primary mRNA per milliliter of reaction. Subsequently, capping of primary mRNA occurs  
185 during transcription using a Cap analog instead of the natural substrate or via a two-step  
186 enzymatic reaction using RNA 2'-O-ribose transferase, RNA methyltransferase, and a methyl  
187 donor substrate <sup>46-49</sup>. Although utilizing Cap analogs is a rapid and practical approach to cap  
188 mRNA, its employment is impeded by the relatively high costs and the instability associated  
189 with the resultant m7GpppN cap structure <sup>4,49</sup>. Conversely, the two-step enzymatic reaction  
190 produces a more authentic and stable m7GpppN cap structure, albeit requiring additional steps  
191 and enzyme reactions, as well as a meticulous selection of suitable enzymes and methyl donor  
192 substrates <sup>28</sup>. To meet clinical quality standards, the mRNA generated upstream needs to  
193 undergo multiple purification steps to separate and purify it from the reaction mixture. Size  
194 exclusion chromatography is a commonly utilized method for separating mRNA molecules  
195 based on their sizes and shapes <sup>50-52</sup>. This approach is both simple and gentle, making it effective  
196 for removing impurities, including residual DNA, RNA, and proteins. Reverse-phase high-  
197 performance liquid chromatography separates mRNA molecules based on their hydrophobicity,  
198 thus providing high resolution and purity, but it can be time-consuming and requires expensive  
199 equipment. Affinity chromatography is another strategy for purifying mRNA vaccines, whereby

specific ligands are used to capture and purify the mRNA molecules<sup>32,50,51</sup>. This method can provide high specificity and yield but may require additional steps for ligand immobilization and can be costly. Ion exchange chromatography is another common method for mRNA purification, which separates molecules based on their charge<sup>29,50,51</sup>. Although this method has high yield and purity, it may require multiple steps and careful optimization to achieve optimal results. In addition to chromatography-based methods, precipitation-based approaches, including isopropanol or ethanol precipitation, can also be used to purify mRNA vaccines<sup>51</sup>. These methods are simple and cost-effective but are less effective in removing impurities, and additional steps for resuspension and quality control may be needed. Ultimately, the purification method chosen for mRNA vaccines depends on various factors, including the desired purity level, scalability, cost, and downstream applications.

211

### 212 **2.3 mRNA vaccine delivery**

213 The delivery of mRNA vaccines into cells presents significant challenges due to the inherent  
214 instability of RNA and the need to protect it from degradation in the extracellular environment.  
215 Over the past few decades, researchers have explored various delivery systems to overcome  
216 these challenges and enhance the efficacy of mRNA vaccines.

217

218 One of the earliest approaches was the use of naked mRNA molecules, which were directly  
219 injected into cells or tissues<sup>4,28,30</sup>. Herein, mRNA is delivered without a carrier, allowing it to  
220 be translated into antigen proteins within cells. While naked mRNA vaccines are relatively easy  
221 to produce and have shown promise in preclinical studies, they are less stable and may elicit  
222 weaker immune responses than mRNA vaccines delivered with carriers<sup>38</sup>. Another early  
223 approach was the mRNA-DC vaccine, which involved the loading of DCs with mRNA  
224 encoding the desired antigen<sup>4,28,30</sup>. The DCs then present the antigen to the immune system,



225 leading to a robust immune response. This approach has shown promise in preclinical <sup>13</sup> studies  
226 for the treatment of cancers and infectious diseases. In recent years, lipid-based nanoparticles  
227 (LNPs) and polyplexes/polymeric nanoparticles have been two of the most commonly used  
228 mRNA vaccine delivery systems <sup>38,41</sup>.

229  
230 LNPs are extensively utilized as <sup>11</sup> delivery systems for mRNA vaccines owing to their  
231 biocompatibility, stability, and <sup>11</sup> ability to protect mRNA from degradation <sup>4,28,38,41,53,54</sup>. LNPs  
232 can be categorized based on the nature of their lipid components, surface charge, and surface  
233 modifications <sup>41,55</sup>. One category is cationic LNPs, with positively charged lipid components  
234 interacting <sup>92</sup> with the negatively charged phosphate backbone of mRNA, facilitating the latter's  
235 delivery into target cells <sup>38</sup>. Previous studies have provided evidence of efficacy of ionizable  
236 LNP-based vaccines against different infectious diseases <sup>4,55</sup>. Ionizable LNPs hold great  
237 potential as a delivery vehicle for mRNA-based vaccines <sup>4,38,41</sup>. These nanoparticles are  
238 composed of a central core of mRNA enclosed by a lipid bilayer that incorporates ionizable  
239 lipids, which allow effective mRNA encapsulation and protection from degradation in the  
240 extracellular milieu. Moreover, the ionizable lipids are instrumental in promoting the  
241 endosomal release and cytoplasmic transport of the mRNA cargo, which is pivotal for efficient  
242 protein expression. Polyethylene glycol (PEG)-ylated LNPs have a hydrophilic coating of PEG  
243 on their surface, which enhances biocompatibility and reduces toxicity <sup>28,38</sup>.

244  
245 Polyplexes and polymeric nanoparticles are versatile delivery systems that have been  
246 extensively studied for mRNA vaccines. Polyplexes are formed by electrostatic interactions  
247 between positively charged polymers, such as polyethyleneimine, and negatively charged  
248 mRNA molecules <sup>56</sup>. These effectively protect mRNA from degradation, facilitate cellular  
249 uptake and enhance immunogenicity due to their cationic charge <sup>56</sup>. Polymeric nanoparticles

250 can be formed from various polymers, including poly lactic-co-glycolic acid and PEG, and  
251 mRNA can be encapsulated through multiple mechanisms, involving electrostatic interactions,  
252 hydrophobic interactions, and covalent bonding<sup>41,57</sup>. These have lower immunogenicity and  
253 toxicity than polyplexes and LNPs and can be engineered to enhance their stability and targeting  
254 specificity<sup>57,58</sup>. However, their transfection efficiency may be lower than that of LNPs, and  
255 their production can be more complex and costly.

256

257 In general, the choice of delivery system depends on several factors, including the specific  
258 characteristics of mRNA vaccine and the desired transfection efficiency, safety, stability, and  
259 target specificity.

260

## 261 2.4 mRNA vaccine adjuvants

262 Immunogenicity modulation is a nonnegligible issue in mRNA vaccine development. Although  
263 *in vitro* transcriptional mRNA has shown some self-adjuvant potential, it is typically not enough  
264 to elicit comprehensive protective immunity and requires intensified repeated/booster regimens  
265 for optimal effectiveness<sup>59</sup>. Multiple strategies have been applied for adjuvants of mRNA  
266 vaccines to regulate their immunogenicity. TriMix is a combination of mRNAs that encode  
267 three distinct immune-stimulating proteins: CD40 ligand (CD40L), CD70, as well as  
268 constitutively active Toll-like receptor 4 (TLR4)<sup>60-62</sup>. Due to its ability to improve DC  
269 activation and enhance the elicitation of CD8<sup>+</sup> T-cell responses, TriMix has been incorporated  
270 into numerous vaccination studies. Moreover, the utilization of cationic lipids is widely  
271 recognized for its ability to improve RNA uptake and facilitate its endosomal escape, resulting  
272 in increased adjuvant activity for mRNA vaccines<sup>63,64</sup>. Furthermore, the incorporation of a  
273 synthetic mRNA sequence with a polymeric carrier has been shown to enhance the adjuvanticity  
274 of various subunit vaccines<sup>65</sup>. CureVac has developed RNAActive® vaccines, which



275 demonstrate inherent self-adjutant activity by incorporating naturally occurring nucleotides  
276 complexed with protamine<sup>66,67</sup>. The co-delivery of this mRNA construct has been proven to  
277 significantly amplify B and T-cell responses along with the amplification of subpopulations  
278 (e.g., Th1 and Th2 cells) and pre-germinal center B cells. However, the adjuvant properties of  
279 these strategies usually activate type I interferon (IFN-I), which might cause the suppression of  
280 protein translation as well as CD8<sup>+</sup> T-cell activation<sup>68,69</sup>. To overcome this limitation, a hybrid  
281 nanoparticle system comprising a poly lactic-co-glycolic acid core and a lipid shell has been  
282 developed for simultaneous delivery of mRNA and a hydrophobic TLR7 adjuvant  
283 (gardiquimod). Poly lactic-co-glycolic acid facilitates the integration of the adjuvant within the  
284 nucleus, whereas the lipid shell enables the loading of mRNA via electrostatic interactions. This  
285 approach has demonstrated potent immune responses targeting specific antigens and highly  
286 effective antitumour activities<sup>70</sup>.

287

### 288 <sup>62</sup> 3. mRNA vaccines in infectious diseases

289 mRNA vaccines are applied as prophylaxis against infectious diseases by encoding disease-  
290 specific antigens. To date, many preclinical and clinical trials using mRNA vaccines to induce  
291 antiviral immunity have been performed in multiple infectious diseases, including severe acute  
292 respiratory syndrome coronavirus 2, zika virus, human immunodeficiency virus, influenza virus,  
293 cytomegalovirus, respiratory syncytial virus, varicella-zoster virus, and rabies virus (Table 1  
294 and Figure 3).

295

#### 296 <sup>2</sup> 3.1 mRNA vaccines against severe acute respiratory syndrome coronavirus 2

297 <sup>10</sup> Since the beginning of 2021, severe acute respiratory syndrome coronavirus 2 (SARS-CoV-2)  
298 has infected countless people as well as caused millions of deaths worldwide. The majority of  
299 <sup>7</sup> SARS-CoV-2 infections do not pose a life-threatening risk to individuals without preexisting

diseases; however, in cases of severe infection, uncontrolled immune responses can be triggered in the lungs, destroying epithelial cells and alveoli, causing pulmonary edema, a dangerous increase in vascular permeability and death <sup>71,72</sup>. The spike protein, which is found on the surface of SARS-CoV-2, facilitates the virus's entry into host cells by binding to the angiotensin-converting enzyme 2 receptors on the surface of the host cells <sup>73</sup>. Therefore, the spike protein represents a prime target for SARS-CoV-2 mRNA vaccines encoding either the receptor-binding domain or the full-length spike protein. To date, two mRNA vaccines designed to target the spike protein of the coronavirus disease 2019 (COVID-19) have gained approval and widespread usage globally. These vaccines include mRNA-1273 developed by Moderna and BNT162b2 developed by BioNTech/Pfizer. Meanwhile, several other mRNA vaccines targeting the spike protein are currently undergoing clinical trials assessing their safety and efficacy.

The initial phase I clinical study for COVID-19 vaccine was conducted on mRNA-1273, which was developed by Moderna. In the formulation of LNPs to encapsulate modified mRNA, the ionizable lipid SM-102 was utilized. The mRNA sequence was modified with N1-methylpseudouridine encoding the spike protein of SARS-CoV-2 with two proline substitutions (S-2P), which induce the prefusion conformation. A study performed by Corbett *et al.* in 2020 exhibited the administration of mRNA-1273 triggered potent humoral and cellular immunity against original and mutant (D614G) SARS-CoV-2 in preclinical models <sup>74,75</sup>. The administration of the vaccine effectively provided protection to mice, preventing SARS-CoV-2 infection in the nasal passages and lungs without evident adverse effects or pathological changes in the respiratory system. The following phase I clinical trial conducted in July 2020 validated the safety and efficacy of mRNA-1273 in humans. The geometric mean titers of anti-S-2P neutralizing antibodies after the second vaccination were 299,751, 782,719, and 1,192,154

in patients who received 25 µg, 100 µg, or 250 µg of mRNA-1273, respectively, suggesting a robust humoral immune response in participants. A robust T cell-mediated cytokine response was also detected<sup>89</sup>. The majority of the reported adverse events<sup>4</sup> following vaccination were mild to moderate in nature. These included symptoms such as headache, chills, injection site pain, fatigue, and myalgia, with more than half of the participants experiencing these effects. Patients who received the 250 µg dose exhibited a higher incidence (21%) of severe adverse events, particularly when the second vaccine was administered<sup>76</sup>. In September 2020, elderly participants were also involved in the trial, without any trial-limiting adverse effects observed<sup>77</sup>. The phase III randomized, placebo-controlled study was carried out at multiple medical centers in the United States from July to December 2020 and involved 30,420 volunteers, and the results showed that SARS-CoV-2 infection was diagnosed in 185 participants in control group, while this infection was diagnosed in only 11 patients in the vaccinated group. mRNA-1273 demonstrated a 94.1% effectiveness against SARS-CoV-2 infection and a 100% efficacy against severe COVID-19 disease, with a transient and mild local and systemic reaction induced by mRNA-1273<sup>78</sup>. In 2022, Creech *et al.* evaluated mRNA-1273 in 6 to 11-year-old children in a phase II/III trial<sup>82</sup>. In the first phase of the trial, 751 children were administered with 50 µg or 100 µg doses of the mRNA-1273 vaccine. On the basis of the results of safety and immunogenicity, the 50 µg dose level was chosen for the second phase of the trial. The second phase of the trial involved the random administration of two injections of mRNA-1273 (50 µg each) or placebo to a group of 4,016 children, and these participants were then monitored for a median duration of 82 days after the first injection. At this dose level, the observed adverse events were primarily mild and temporary, with injection-site pain, headache, and fatigue being the most commonly reported. As of the data-cut-off date, no severe side effects associated with the vaccine were reported, such as multisystem inflammatory syndrome, myocarditis, or pericarditis. At one month following the second injection, children receiving mRNA-1273 at a

350 50 µg level exhibited a neutralizing antibody titer of 1610, whereas young adults receiving the  
351 100 µg level had a titer of 1300. Serologic responses were observed in a minimum 99.0% of  
352 participants within both age cohorts. At a point when the dominant circulating variant was Delta,  
353 the evaluated vaccine effectiveness <sup>5</sup> against COVID-19 occurring 14 days or more after the  
354 initial injection was 88.0%. Overall, mRNA-1273 shows promising anti-COVID-19 efficacy,  
355 significantly protecting individuals from COVID-19.

356  
357 BNT162b1 and BNT162b2 are two <sup>3</sup> COVID-19 mRNA vaccines developed by BioNTech and  
358 Pfizer. These vaccines are enclosed within LNPs and formulated utilizing Acuitas Therapeutics'  
359 ionizable lipid ALC-0315. The mRNA in these vaccines is nucleoside-modified, with all  
360 uridines substituted <sup>7</sup> by N1-methylpseudouridine, which enhances mRNA translation.  
361 BNT162b1 encoded a secreted S glycoprotein receptor-binding domain (RBD) protein, while  
362 BNT162b2 encoded the S-2P protein. The relevant phase I clinical <sup>39</sup> study was performed in April  
363 2020, and healthy participants in distinct groups were treated with either placebo or two doses  
364 of one of the two vaccines mentioned above at differential doses (<sup>132</sup> 10 µg, 20 µg, 30 µg, and 100  
365 µg) with a 21-day interval. Both BNT162b1 and BNT162b2 resulted in a strong serologic  
366 response against the virus <sup>13</sup> in a dose-dependent manner, especially following the second dose.  
367 The highest level of neutralizing antibodies was detected on day 35, which was 14 days after  
368 the second dose <sup>80,81</sup>. Although both BNT162b1 and BNT162b2 elicited a potent and robust  
369 immune response, BNT162b2 was related to a lower risk of systematic adverse effects than  
370 BNT162b1, especially in elderly participants, leading to the selection of BNT162b2 to be used  
371 in a broader cohort enrolled in a phase III clinical study involving 43,448 participants enrolled  
372 from April to December 2020 <sup>81</sup>. A total of <sup>11</sup> 21,720 participants received BNT162b2, while  
373 21,728 participants received a placebo. The results revealed that eight patients in the vaccinated  
374 group were <sup>169</sup> diagnosed with SARS-CoV-2 infection, whereas 162 patients in the placebo group

375 were found to be infected, suggesting that the efficacy of BNT162b2 was 95%. Among the  
376 infected patients, 10 were severely ill, with nine of them belonging to the placebo group and  
377 one to the vaccinated group <sup>82</sup>. In addition, BNT162b2 vaccination elicited a strong and  
378 enduring response of T follicular helper cells in humans <sup>83</sup>. In a study performed by Muik *et al.*  
379 in 2022, sera from 51 individuals receiving two or three doses of BNT162b2 vaccine were  
380 tested against original type, Beta, Delta, or Omicron pseudoviruses <sup>84</sup>. After two doses, the  
381 neutralizing titers against the Omicron variant showed a reduction of more than 22-fold  
382 compared to the titers against the wild-type. One month after receiving the third vaccine dose,  
383 the neutralizing titers against the Omicron variant enhanced by 23-fold compared to the titers  
384 after two doses, which were analogous to the levels of neutralizing titers against the original  
385 type observed after two doses. Together, BNT162b2 is associated with superior safety and  
386 exhibits potent efficiency against COVID-19, which is also effective in the context of variants.

387  
388 Multiple trials have compared the efficacy of mRNA-1273 and BNT162b2 vaccines. In a study  
389 performed by Wang *et al.* in 2022, a comparison was made between mRNA-1273 and  
390 BNT162b2 vaccines in terms of breakthrough SARS-CoV-2 infections, hospitalizations, and  
391 deaths during the period when the delta variant was predominant <sup>85</sup>. The monthly incidence rate  
392 of breakthrough infections showed a gradual increase from July to November 2021 in both the  
393 BNT162b2 cohort and the mRNA-1273 cohort. However, the incidence rate was elevated in the  
394 BNT162b2 cohort compared with the mRNA-1273 cohort. Specifically, in November, the  
395 incidence rate reached 2.8 cases per 1000 person-days in the BNT162b2 cohort as well as 1.6  
396 cases per 1000 person-days in the mRNA-1273 cohort. After conducting matching analysis, it  
397 was found that the mRNA-1273 cohort, consisting of 62,584 individuals, exhibited a markedly  
398 decreased hazard for breakthrough infections relative to BNT162b2 cohort, which also included  
399 62,584 individuals. Among the patients who experienced breakthrough infections, it was



400 observed that individuals receiving the mRNA-1273 vaccine were generally older compared to  
401 those receiving the BNT162b2 vaccine. There were also differences in terms of sex, racial and  
402 ethnic composition, and the presence of comorbidities and adverse social determinants of health.  
403 After conducting the matching analysis, these differences were no longer found to be  
404 statistically significant. Among the individuals receiving the mRNA-1273 vaccine, the 60-day  
405 hospitalization risk was 12.7%, with 392 out of 3,078 recipients requiring hospitalization. In  
406 comparison, among those receiving the BNT162b2 vaccine, the 60-day hospitalization risk was  
407 slightly higher at 13.3%, with 2,489 out of 18,737 recipients requiring hospitalization. In terms  
408 of mortality, the 60-day mortality rate for mRNA-1273 recipients was 1.14%, with 35 out of  
409 3,078 individuals experiencing mortality. For BNT162b2 recipients, the 60-day mortality rate  
410 was 1.10%, with 207 out of 18,737 individuals experiencing mortality. Among the matched  
411 cohorts consisting of 3,054 individuals in each group, recipients of the mRNA-1273 vaccine  
412 showed a decreased risk of 60-day hospitalizations compared to those of the BNT162b2 vaccine.  
413 Similarly, a study performed by Dickerman *et al.* examined the efficacy of the BNT162b2 and  
414 mRNA-1273 vaccines in a group of U.S. Veterans<sup>86</sup>. Each vaccine group consisted of 219,842  
415 individuals. During the 24-week follow-up period, which was characterized by the  
416 predominance of the alpha variant, the assessed risk of documented infection was 5.75 events  
417 per 1000 individuals in the BNT162b2 group and 4.52 events per 1000 individuals in the  
418 mRNA-1273 group. The additional quantity of events per 1000 individuals for BNT162b2  
419 relative to mRNA-1273 was 1.2 for documented infection, 0.44 for symptomatic COVID-19,  
420 0.55 for hospitalization for COVID-19, 0.10 for ICU admission for COVID-19, and 0.02 for  
421 mortality from COVID-19. The relative excess risk of documented infection for BNT162b2  
422 compared to mRNA-1273 over a 12-week follow-up period, during which the delta variant was  
423 predominant, was 6.54 events per 1000 persons. Together, relative to people vaccinated with  
424 mRNA-1273, those with BNT162b2 show lower rates of symptoms, hospitalization, ICU

425 admission, and death, despite the higher infection rate.

426

427 Multiple studies have been conducted to explore the utilization of mRNA-1273 or BNT162b2  
428 in the context of SARS-CoV-2 variants. Both mRNA-1273 and BNT162b2 vaccines  
429 demonstrated enhanced potency and breadth in memory B-cell response, effectively triggering  
430 neutralizing immunity against the SARS-CoV-2 omicron variant<sup>87-90</sup>. Fabiani *et al.* conducted  
431 a study to assess the effectiveness of mRNA vaccines and the waning protection against SARS-  
432 CoV-2 infection as well as severe COVID-19 in a population of 33,250,344 individuals aged  
433 16 years and above receiving their initial dose of either BNT162b2 or mRNA-1273 vaccine and  
434 showed no better diagnosis of SARS-CoV-2 infection in Italy<sup>91</sup>. In the period characterized by  
435 the prevalence of the delta variant, vaccine efficacy against SARS-CoV-2 infection notably  
436 declined from 82% at 3-4 weeks to 33% at 27-30 weeks after the second dose. In the same time  
437 intervals, the effectiveness of the vaccines against severe COVID-19 also experienced a decline,  
438 although the decline was not as pronounced, from 96% to 80%. At 27-30 weeks after the second  
439 dose of the vaccine, high-risk individuals, including those aged 80 years and older, as well as  
440 those aged 60-79 years, did not appear to be adequately protected against infection. Abu-  
441 Raddad *et al.* investigated the impact of mRNA vaccine boosters on SARS-CoV-2 omicron  
442 infection in 2,239,193 individuals administrated with a minimum of two doses of the  
443 BNT162b2 or mRNA-1273 vaccine in Qatar<sup>92,93</sup>. After 35 days of follow-up, the cumulative  
444 incidence of symptomatic omicron infection among individuals who received the BNT162b2  
445 vaccine was 2.4% in the booster cohort and 4.5% in the nonbooster cohort. The effectiveness  
446 of the booster dose in protecting against symptomatic omicron infection, when compared to the  
447 initial primary series, was determined to be 49.4%. The efficacy of the booster dose in reducing  
448 COVID-19-related hospitalization and mortality owing to omicron infection, compared to the  
449 initial vaccine series, was estimated to be 76.5%. The effectiveness of the BNT162b2 booster

dose in decreasing symptomatic infection with the delta variant, relative to the initial vaccine series, was estimated to be 86.1%. Among individuals who received the mRNA-1273 vaccine, the cumulative incidence of symptomatic omicron infection was 1.0% in the booster cohort and 1.9% in the nonbooster cohort after 35 days. The effectiveness of the mRNA-1273 booster dose in reducing symptomatic omicron infection, relative to the primary vaccine series, was estimated to be 47.3%. In addition, Accorsi *et al.* investigated the relation between 3 doses of BNT162b2 or mRNA-1273 and symptomatic infection resulted from the SARS-CoV-2 omicron and delta variants<sup>94</sup>. Among the reported cases, 18.6% (n = 2,441) of omicron cases, 6.6% (n = 679) of delta cases, and 39.7% (n = 18,587) of controls had received three doses of mRNA vaccines. Furthermore, 55.3% (n = 7,245) of cases, 44.4% (n = 4,570) of delta cases, and 41.6% (n = 19,456) of controls had received two doses of mRNA vaccines. Lastly, 26.0% (n = 3,412) of cases, 49.0% (n = 5,044) of delta cases, and 18.6% (n = 8,721) of controls were reported to be unvaccinated. After adjusting for relevant factors, the odds ratio for receiving three doses compared to being unvaccinated was 0.33 for omicron cases and 0.065 for delta cases. Similarly, the odds ratio for three vaccine doses compared to two doses was 0.34 for omicron cases and 0.16 for delta cases. Grewal *et al.* conducted a study to estimate the marginal efficacy of a fourth dose relative to a third dose, as well as the overall vaccine effectiveness of BNT162b2 and mRNA-1273 against any infection, symptomatic infection, and severe outcomes (hospital admission or death) associated with the omicron variant of SARS-CoV-2<sup>95</sup>. When comparing a fourth dose of the vaccine (with 95% of recipients receiving mRNA-1273) administered seven days or more after vaccination to a third dose received 84 or more days prior, the marginal effectiveness was estimated to be 19% against any infection, 31% against symptomatic infection, and 40% against severe outcomes (hospital admission or death). The effectiveness of the vaccine in individuals receiving the vaccine, as compared with those who were unvaccinated, showed a progressive increase with each additional dose. Specifically, for a fourth dose, the



effectiveness was observed to be 49%<sup>58</sup> against overall infection, 69% against symptomatic infection, and 86% against severe outcomes. Lauring<sup>32</sup> *et al.* assessed clinical severity and efficacy of BNT162b2 and mRNA-1273 vaccines against COVID-19 caused by the omicron, delta, and alpha variants of the SARS-CoV-2 virus<sup>96</sup>. The study involved a total of 5,728 individuals with COVID-19 and 5,962 individuals without COVID-19 in the United States.<sup>38</sup> Among individuals who received two vaccine doses, the rates were 85% for the alpha variant, 85%<sup>27</sup> for the delta variant and 65% for the omicron variant. For individuals who received three vaccine doses, the rate was 94% against the delta variant and 86%<sup>5</sup> against the omicron variant. In-hospital mortality was 7.6% (81/1060) for alpha, 12.2% (461/3788) for delta, and 7.1% (40/565) for omicron. For unvaccinated patients with COVID-19 who were hospitalized, the severity of illness, as measured by the WHO clinical progression scale, was found to be elevated<sup>32</sup> for the delta variant compared to the alpha variant, with an adjusted proportional odds ratio of 1.28. Conversely, the severity of illness was lower<sup>32</sup> for the omicron variant relative to the delta variant, with an adjusted proportional odds ratio of 0.61. Compared with unvaccinated patients, vaccinated patients exhibited lower severity of illness<sup>5</sup> for each variant, including the alpha variant (adjusted proportional odds ratio 0.33), the delta variant (0.44), and the omicron variant (0.61). Together, mRNA-1273 and BNT162b2 also show protective efficacy in the context of COVID-19, with BNT162b2 showing superior efficacy against COVID-19 variants. Although this effect declines over time, further booster doses can partially reverse this phenomenon, representing a strategy against COVID-19 variants.

On August 31, 2022, the U.S. Food and Drug Administration (FDA) has updated the emergency<sup>23</sup> use authorizations for the Moderna COVID-19 Vaccine and the Pfizer-BioNTech COVID-19 Vaccine to allow for the use<sup>23</sup> of bivalent formulations as a single booster dose (derived from <https://www.fda.gov/news-events/press-announcements/coronavirus-covid-19-update-fda->

authorizes-moderna-pfizer-biontech-bivalent-covid-19-vaccines-use). The updated boosters include two mRNA elements derived from the SARS-CoV-2 virus. These bivalent formulations consist of one component from the initial type of the virus and another element owned by the BA.4 and BA.5 lineages of the omicron variant. The recommended interval for administering the booster dose is at least two months after the primary or previous booster vaccination. The Moderna COVID-19 Vaccine, Bivalent, has been approved as a standalone booster shot for individuals who are 18 years old or older. The Pfizer-BioNTech COVID-19 Vaccine, Bivalent, has been authorized as a single booster dose for people who are 12 years old and above. The FDA conducted an evaluation of immune response data involving around 600 adults aged 18 and above who had already received two doses of the primary series and an additional booster dose of the monovalent Moderna COVID-19 vaccine. These individuals were administered a second booster dose of the monovalent Moderna COVID-19 vaccine or Moderna's experimental bivalent COVID-19 vaccine, which includes the original strain and the BA.1 Omicron variant, minimum three months after their initial booster shot. After a period of 28 days, the group receiving the bivalent vaccine demonstrated a superior immune response against the BA.1 Omicron variant compared to the group receiving the monovalent Moderna COVID-19 vaccine. Since the bivalent (original and omicron BA.1) and monovalent Moderna COVID-19 vaccines are manufactured using the same process, the safety data obtained from the bivalent vaccine are relevant and applicable to the monovalent Moderna COVID-19 vaccine. To assess the efficacy of a single booster shot of the Pfizer-BioNTech COVID-19 vaccine, Bivalent, for individuals aged 12 and above, the FDA examined immune response data from around 600 individuals over the age of 55 previously receiving a two-dose primary series and an additional booster dose using the monovalent Pfizer-BioNTech COVID-19 vaccine. These individuals were administered a second booster dose of the monovalent Pfizer-BioNTech COVID-19 vaccine or Pfizer-BioNTech's experimental bivalent COVID-19 vaccine, which includes the original strain

525 and the BA.1 Omicron variant, between 4.7 and 13.1 months after their initial booster dose.  
526 After one month, the immune responses against BA.1 Omicron variant in the group  
527 receiving the bivalent vaccine was found to be superior to the immune responses observed in  
528 the group receiving the monovalent Pfizer-BioNTech COVID-19 vaccine. Because the bivalent  
529 vaccine and the monovalent vaccine are manufactured using the same process, the safety data  
530 are relevant to the Pfizer-BioNTech COVID-19 vaccine. Following this approval, the FDA has  
531 revised the emergency use authorizations for the Moderna COVID-19 vaccine and the Pfizer-  
532 BioNTech COVID-19 Vaccine, eliminating the usage of the monovalent Moderna and Pfizer-  
533 BioNTech COVID-19 vaccines for booster doses in people 18 years and older and 12 years  
534 older, respectively. These monovalent vaccines are still authorized for application as a primary  
535 series for individuals aged 6 months and above, as outlined in their respective letters of  
536 authorization. The Pfizer-BioNTech COVID-19 vaccine is presently authorized for a single  
537 booster shot for people who are 5 to 11 years old, minimum five months after finishing a  
538 primary series of the Pfizer-BioNTech COVID-19 vaccine. Overall, the bivalent vaccine  
539 represents a new step of mRNA vaccines against COVID-19.

540  
541 One of the problems with mRNA vaccines is the requirement of extremely low-temperature  
542 storage, which limits their application in areas with poor conditions and low economic levels.  
543 CVnCoV is a chemically unmodified mRNA vaccine encoding S-2P developed by CureVac AG,  
544 which is stable at +5°C for at least three months and was first reported in April 2020. Preclinical  
545 models using CVnCoV revealed that this vaccine induced robust humoral responses as well as  
546 strong T-cell responses with potent induction of IFN- $\gamma$ <sup>+</sup> TNF<sup>+</sup> T cells. In addition, the animals  
547 infected with SARS-CoV-2 with the spike D614G substitution four weeks after vaccination  
548 showed no detectable virus in the lower respiratory tract after a dose of 10  $\mu$ g. Moreover,  
549 CVnCoV decreased the histopathological alterations in the lungs of mice infected with SARS-

550 CoV-2<sup>97</sup>. The phase I clinical trial performed in June 2020 exhibited that two doses of CVnCoV  
551 administered to individuals were safe and well tolerated. CVnCoV significantly increased the  
552 levels of IgG antibodies to S-protein, as well as RBD in a dose-dependent manner, and the  
553 median antibody titers after two 12 µg doses of CVnCoV were similar to those in the serum  
554 from patients with COVID-19<sup>98</sup>. Therefore, a dose of 12 µg was chosen for the phase II/III trial.  
555 The randomized phase IIb/III clinical trial was conducted in 47 centers all over the world from  
556 December 2020 to April 2021. After more than 40 days of observation, 83 patients among the  
557 12,851 in the CVnCoV group were diagnosed with SAR-CoV-2 infection, and 145 patients  
558 among the 12,211 in the placebo group were diagnosed with SAR-CoV-2 infection; the overall  
559 vaccine efficacy of only 48.2% was partly owing to the presence of SARS-CoV-2 variants<sup>98</sup>.  
560 The same year, CureVac AG announced its second-generation mRNA vaccine CV2CoV, which  
561 possesses optimized noncoding regions to improve the level of the targeted antigen. CV2CoV  
562 induced higher titers of neutralizing antibodies and stronger T-cell responses in nonhuman  
563 primates than CVnCoV. Moreover, the findings of the challenge assay displayed that CV2CoV  
564 induced stronger protection with lower viral loads in both upper and lower respiratory tract.  
565 Clinical trials have been planned and will be performed soon in the future<sup>99</sup>.

566  
567 ARCoV is an LNP mRNA vaccine encoding an RBD protein that was developed by Abogen in  
568 2020. ARCoV mRNA-LNP used in preclinical mouse models triggered high titers of  
569 neutralizing antibodies and strong T-cell responses against SARS-CoV-2, with significantly  
570 increased IFN-γ and TNF-α secreted by virus-specific CD4<sup>+</sup> and CD8<sup>+</sup> T cells. Further infection  
571 with SARS-CoV-2 in vaccinated mice showed that ARCoV protected mice from SARS-CoV-2  
572 infection with no measurable viral RNA in the lungs of the vaccinated mice<sup>100</sup>. Two doses of  
573 ARCoV in nonhuman primate models triggered potent humoral responses characterized by  
574 elevated titers of neutralizing antibodies and strong cellular responses against SARS-CoV-2 in

575 cynomolgus macaques. The challenge assay revealed no detectable viral small guide RNAs in  
576 the trachea and lung lobes of all the vaccinated cynomolgus macaques, while robust viral  
577 replication was present in macaques receiving a placebo treatment. These results suggested the  
578 ability of ARCoV to prevent <sup>13</sup> SARS-CoV-2 replication in the lower respiratory tract <sup>101</sup>. A phase  
579 III clinical study was initiated in April 2021 in multiple centers in Indonesia and Mexico  
580 (NCT04847102). Further exposure of clinical results is required to assess the effectiveness of  
581 this mRNA vaccine.

582

583 LUNAR-COV19 is a self-replicating mRNA vaccine encoding an S-2P antigen developed by  
584 Arcturus in 2020, with the aim of offering robust immunity with a single low-dose  
585 administration <sup>102</sup>. LUNAR-COV19 used in preclinical models induced a robust T-cell response  
586 with an expanded CD44<sup>+</sup>CD62L<sup>-</sup> effector/memory subset, enhanced the proportion of IFN- $\gamma$ <sup>+</sup>  
587 <sup>43</sup> CD8<sup>+</sup>/CD4<sup>+</sup> T cells, as well as resulted in potent humoral responses with high titers of  
588 neutralizing antibodies. Eighty percent of mice treated with 10 mg LUNAR-COV19 exhibited  
589 PRNT50 titers > 320 at 30 days after vaccination. The human ACE2 transgenic C57BL/6 mouse  
590 model was used for the challenge assay, revealing unchanged weight and no clinical sign in the  
591 vaccinated mice after infection with original type SARS-CoV-2, while mice that received  
592 placebo showed an increased clinical score and a significant decrease in weight after infection  
593 <sup>103</sup>. The assessment of the viral load revealed no detectable <sup>4</sup> SARS-CoV-2 RNA in both lungs of  
594 the vaccinated mice compared to the mice treated with placebo. LUNAR-COV19 used in a  
595 phase II clinical study (NCT04480957) was well tolerated, and increased neutralizing antibody  
596 levels were observed in the enrolled patients. Further investigation is required for broader  
597 application of this vaccine.

598

599 Together, the approvals of mRNA vaccines not only protect numerous individuals from



COVID-19 but also provide valuable experience<sup>99</sup> for the development of mRNA vaccines<sup>11</sup> against other diseases. Of note, although various anti-SARS-CoV-2 mRNA vaccines have been prepared and used in humans, there are still problems that have not been solved, and the mechanism of action is still unclear. For example, the duration of the protection provided by the mRNA vaccine in humans against COVID-19, as well as how to increase the levels of IgA antibodies, which are those that mainly protect the upper respiratory tract, are not yet known. How to reduce the rate of adverse effects, as the incidence of systemic adverse events induced by mRNA vaccines is still higher compared to those triggered by inactivated virus vaccines or protein subunits, as demonstrated in previous clinical trials. Long-term monitoring might provide more detailed and useful information leading to the safe and extensive application<sup>18</sup> of mRNA vaccines.

611

### 3.2 mRNA vaccines against zika virus

<sup>137</sup> Zika virus (ZIKV) is an RNA virus with a positive sense, single-stranded genome measuring 11 kilobases in length<sup>104</sup>. People infected with ZIKV often develop fever, headache, rash, malaise, and conjunctivitis that last between two and seven days. However, its tropism for progenitor neural cells causes neurodevelopmental birth defects and congenital malformation in a limited number of instances<sup>105</sup>. Preventive vaccination is the only option against the complications of ZIKV infection, as no drug against this virus is available<sup>106</sup>. Membrane and envelope proteins are common antigens for mRNA vaccines against ZIKV. To date, several ZIKV vaccines developed on the basis of the mRNA platform have been tested in preclinical models. In 2017, Pardi *et al.* designed an LNP-enclosed mRNA vaccine encoding the glycoproteins of the membrane and envelope of ZIKV<sup>107</sup>. The administration of 30 µg mRNA vaccine in C57BL/6 mice elicited a robust immune response without any inflammation or other adverse events. The ZIKV reporter viral particle assay showed that the mean neutralizing IgG

625 against the ZIKV virus peaked at 8 weeks after vaccination and was stable until 12 weeks after  
626 administration. Strong E-protein-specific CD4<sup>+</sup> T-cell responses were also observed as  
627 evidenced by robust intracellular production of IL-2, TNF- $\alpha$ , and IFN- $\gamma$ .<sup>162</sup> Moreover, a challenge  
628 study showed that mice and nonhuman primates treated with the mRNA vaccine exhibited  
629 protection against ZIKV infection<sup>107</sup>. The same year, Richner *et al.* developed an LNP-enclosed  
630 mRNA vaccine encoding both original type and variant ZIKV membrane glycoproteins. Two  
631 doses of the mRNA vaccine potentiated the serum neutralizing responses against ZIKV and  
632 protected mice against ZIKV infection. The efficacy of the mRNA vaccine was also assessed  
633 in a mouse pregnancy model. The vaccinated mice were infected with ZIKV at embryo day six,  
634 and the results exhibited two doses of mRNA vaccine significantly reduced the levels of viral  
635 RNA in both fetal and placental tissues<sup>108,109</sup>. Although the results of the mRNA ZIKV vaccine  
636 in preclinical studies are promising, further human clinical trials are needed. However, clinical  
637 trials for these vaccines in pregnant women are undermined by ethical issues.

### 638 639 **3.3 mRNA vaccines against human immunodeficiency virus**<sup>34</sup>

640 Human immunodeficiency virus (HIV) is a member of the Lentivirus genus of the retroviridae  
641 family and is divided into two types: HIV-1 and HIV-2<sup>110,111</sup>. HIV causes acquired immune  
642 deficiency syndrome (AIDS), which infects 75 million people worldwide, causing more than  
643 32 million AIDS-related deaths (derived from Global HIV and AIDS statistics, 2019). No  
644 effective preventive vaccine exists despite 30 years of research, primarily because of significant  
645 antigenic diversity of the protein found in the HIV envelope and its dense "glycan shield that  
646 hides the epitope of the crucial envelope protein. Multiple mRNA vaccines have been  
647 investigated in clinical studies to date. In 2016, Gandhi *et al.* used mRNA-transfected  
648 autologous DCs to stimulate the immune response against HIV-1<sup>112</sup>. Fifteen patients were  
649 involved in the trial and randomly assigned to two separate groups that received DC mRNA

148  
vaccines encoding HIV-1 antigen or placebo. The proliferative response of CD4<sup>+</sup> T cells to HIV-  
1 Gag was significantly enhanced by DC mRNA vaccines, with a 3.4-fold increase compared  
to that in participants administrated with placebo. However, no significant release of IFN- $\gamma$  was  
detected, and the increase in the CD8<sup>+</sup> T cell proliferative response was transient<sup>112</sup>. In 2017,  
Jong *et al.* developed an HIV mRNA immunogen<sup>15</sup> based on conserved targets of effective  
antiviral T-cell responses against HIV<sup>113</sup>. The phase I trial using increasing doses of this vaccine  
showed that it was safe and well tolerated<sup>113</sup>. Despite these encouraging findings, the phase II  
clinical study in the same year was stopped due to the production of insufficient  
immunogenicity by the vaccine. In 2020, Gay *et al.* combined AGS-004, a DC mRNA vaccine,  
with the latency-reversing agent vorinostat and evaluated the effect on the HIV reservoir. The  
aim of this combination therapy was to disrupt the virological latency by vorinostat and to  
deplete cells expressing HIV antigens and clear the HIV reservoir by the mRNA vaccine.  
However, although the combination of AGS-004 and vorinostat was safe and well tolerated, no  
substantial impact on the immune response against HIV was observed, and the frequency of  
resting CD4<sup>+</sup> T-cell infection was stable throughout the entire treatment in all participants<sup>114</sup>.  
A mRNA vaccine concurrently expressed<sup>2</sup> membrane-anchored HIV-1 envelope (Env) and  
simian immunodeficiency virus (SIV) Gag proteins, was created to generate of virus-like  
particles<sup>115</sup>. This vaccine formulation elicited the production of antibodies with broad  
neutralizing capabilities against HIV-1 and demonstrated a reduction in the risk of infection in<sup>9</sup>  
rhesus macaques. Rhesus macaques were initially primed with an mRNA vaccine containing a<sup>2</sup>  
transmitted founder clade-B env protein lacking the N276 glycan. Multiple booster  
immunizations were administered to the rhesus macaques using autologous Envs that were<sup>2</sup>  
repaired with the missing glycan and subsequently with bivalent heterologous Envs from clades  
A and C. The vaccination regimen described was highly effective in<sup>167</sup> inducing a strong immune  
response, resulting in the production of<sup>2</sup> neutralizing antibodies against the most prevalent (tier-



2) strains of HIV-1 and robust anti-Env CD4<sup>+</sup> T cell responses. Upon conducting multiple low-dose mucosal challenges with heterologous tier-2 simian-HIV AD8, the vaccinated animals demonstrated a 79% per-exposure risk decrease. The findings suggest that the multiclade Env-Gag virus-like particle mRNA platform holds promise as a potential method for developing an HIV-1 vaccine. Of note, a biotech firm, in collaboration with the nonprofit partner IAVI (International AIDS Vaccine Initiative), has initiated a phase I clinical trial for an investigational mRNA HIV vaccine (<https://investors.modernatx.com/news/news-details/2022/IAVI-and-Moderna-Launch-Trial-of-HIV-Vaccine-Antigens-Delivered-Through-mRNA-Technology/default.aspx>). The vaccine candidate in question utilizes a prime and boost strategy to elicit targeted B-cell responses with the objective of generating broadly neutralizing antibodies against HIV. The antigens employed in the vaccine were developed as proteins by scientists at IAVI. They previously investigated the prime antigen in an adjuvanted protein-based vaccine, inducing the desired B-cell response in 97% of trial participants. Notably, the development of the mRNA HIV vaccine is still in its initial stage. More research is needed to optimize this treatment strategy for long-lasting immune responses. The studies focus on the simultaneous administration of drugs that help reactivate the HIV reservoir to make it visible to the immune system and may eventually improve the efficacy of the mRNA HIV vaccine.

### 3.4 mRNA vaccines against influenza virus

Influenza viruses are members of the Orthomyxoviridae family composed mainly of four types of influenza viruses: types A, B, C, and D; among them, types A and B are clinically associated with human diseases<sup>116,117</sup>. The typical target of the mRNA vaccine against influenza virus is the glycoprotein haemagglutinin (HA) on the surface of the virus since it mediates viral entry. However, owing to the rapid mutation of the influenza virus, which leads to antigenic drift, the HA antigen component of the mRNA vaccine requires annual review and modification. This

feature makes the mRNA vaccine the most suitable platform in preventing influenza virus infection and controlling the spread of the disease. In 2012, Petsch et al. made a significant breakthrough by demonstrating the effectiveness of an mRNA vaccine against influenza encoding the <sup>14</sup>full-length HA of influenza A/Puerto Rico/8/1934 (PR8HA) <sup>118</sup>. The serum of the mRNA-vaccinated mice showed effective seroconversion with an increased amount of virus neutralizing antibodies. Moreover, the CD8<sup>+</sup> T cells from the vaccinated mice had increased cytotoxic activity associated with viral clearance and long-term immunological memory. The administration of mRNA vaccines also induced long-term immunity and protected animals (mice, ferrets, and pigs) from influenza A virus infection <sup>118</sup>. Of note, the mRNA vaccine encoding HA <sup>7</sup>from the PR8 H1N1 strain triggered homologous and heterologous immune responses <sup>150</sup>against H1N1 and H5N1 strains, suggesting protection against heterogeneous viruses <sup>118</sup>. In 2017, Lutz *et al.* developed an LNP-enclosed mRNA vaccine encoding the HA of the influenza virus strain H1N1pdm09 <sup>62</sup>. The use of an mRNA vaccine induced an enhanced adaptive immune response represented by a transient local immunostimulatory milieu. The serum of the vaccinated mice showed an increased amount of multifunctional <sup>7</sup>CD4<sup>+</sup> and CD8<sup>+</sup> T cells specifically against the influenza virus. The injection of mRNA vaccine induced a stable humoral response against influenza virus for at least one year comparable with that of other inactivated virus-based licensed vaccines, as demonstrated by a continuous follow-up <sup>68</sup>of functional antibody and T-cell responses <sup>119</sup>. The same year, Bahl *et al.* developed mRNA vaccines encoding the HA proteins of H10N8 and H7N9 <sup>34</sup><sup>120</sup>, which induced robust humoral and cellular responses in preclinical mouse models, protecting mice from a lethal infection <sup>120</sup>. Feldman *et al.* further performed <sup>19</sup>the first randomized phase I clinical trial utilizing two <sup>19</sup>mRNA vaccines against H10N8 and H7N9 <sup>121</sup>. These two vaccines were well tolerated without any serious vaccine-related adverse events. The HA inhibition titers after the intradermal administration of 50 µg mRNA vaccine were ≥ 1:40 in 89.7% of patients. However, a

725 significantly enhanced cellular response was not detected <sup>121</sup>. In 2021, Chivukula *et al.* used  
726 unmodified and LNP-encapsulated mRNA encoding full-length HA or full-length  
727 neuraminidase (NA) <sup>2</sup>. The HA and NA mRNA-LNP formulations, whether administered as  
728 monovalent or multivalent vaccines, have demonstrated the ability to elicit robust functional  
729 antibody and cellular immune responses in nonhuman primates. The induced antigen-specific  
730 antibody responses have been found to be correlated with protective effectiveness against viral  
731 challenge in mice. In 2022, McMahon *et al.* assessed immunogenicity and protective efficacy  
732 of a quadrivalent nucleoside-modified mRNA vaccine against influenza in mice. This vaccine  
733 formulation included four antigens from influenza A group 2 viruses: HA stalk, NA, matrix  
734 protein 2, and nucleoprotein <sup>170</sup>. The vaccination elicited antigen-specific cellular and humoral  
735 immunity, protected mice from all challenge viruses, and provided protection from morbidity  
736 at a dose of 125 ng per antigen. The same year, Pardi *et al.* developed a pentavalent nucleoside-  
737 modified mRNA vaccine that offered broad protection against influenza B viruses encoding  
738 antigens, B/Yamagata/16/1988-like lineage HA, B/Victoria/2/1987-like lineage HA, NA,  
739 matrix-2, and nucleoprotein <sup>33</sup>. This vaccine provided protection from morbidity at an  
740 impressively low dose of 50 ng per antigen. Additionally, Arevalo *et al.* developed a multivalent  
741 nucleoside-modified mRNA vaccine targeting all known influenza virus subtypes <sup>78</sup>. This  
742 multivalent vaccine, which encoded HA antigens from all 20 known subtypes of influenza A/B  
743 virus lineages, elicited strong antibody responses in mice and ferrets. These antibodies showed  
744 reactivity against all 20 encoded antigens and provided protection to mice and ferrets when  
745 challenged with both matched and mismatched viral strains. In general, mRNA vaccines with a  
746 rapid speed of production may become a critical treatment against influenza viruses. Further  
747 randomized studies are necessary to confirm the safety and effectiveness of mRNA influenza  
748 vaccines.

749

### 750 3.5 mRNA vaccines against cytomegalovirus

751 Human cytomegalovirus (CMV) belongs to the Betaherpesvirinae subfamily and possesses a  
752 genome size of 236 kilobases <sup>126</sup>. Following primary infection, CMV typically establishes a  
753 latent state, persisting in the host without causing active disease. Virus reactivation in  
754 immunocompromised individuals can cause life-threatening complications involving the <sup>26</sup>lung,  
755 <sup>65</sup>gastrointestinal tract, liver, eye, or central nervous system. CMV is recognized as the most  
756 prevalent <sup>infectious cause of congenital malformations, with</sup> sensorineural hearing loss,  
757 <sup>developmental delay, and fetal death in 10%–15% of cases</sup> <sup>126,127</sup>. <sup>The</sup> process of viral entry  
758 <sup>15</sup>into host cells is facilitated by the presence of viral envelope glycoproteins (g) gB and gH/gL  
759 (pentameric complex (PC)), and cell–cell fusion events allow the dissemination of the virus  
760 <sup>128,129</sup>. In 2018, John *et al.* developed an mRNA vaccine encoding multiple CMV antigens, and  
761 the results using *in vitro* cell experiments showed that the mRNA-transfected cells expressed  
762 high levels of the encoded antigens. The administration of mRNA CMV vaccines in mice  
763 generated long-lasting and high titers of neutralizing antibodies against gB and PC. In addition,  
764 <sup>140</sup>an enhanced proportion of IFN- $\gamma$ -producing T cells was observed in vaccinated mice <sup>130</sup>. In  
765 <sup>13</sup>2020, Nelson *et al.* tested an mRNA vaccine encoding full-length gB in rabbits, which showed  
766 enhanced virus neutralization ability and superior whole-virion phagocytosis activity compared  
767 with other vaccinated groups. The long-lasting immune response encourages the use of this  
768 mRNA vaccine in future clinical studies <sup>131</sup>. In 2021, Webster *et al.* administered an mRNA  
769 vaccine encoding CMV gB and PC by intramuscular injection to cynomolgus and rhesus  
770 macaques, and an increased level of antigen-specific plasma antibody was detected in both  
771 species. The elicited antibodies against PC were dose dependent, while the boosted antibodies  
772 against gB were similar in groups treated with 20  $\mu$ g vaccine and 120  $\mu$ g vaccine. However,  
773 mRNA had no significant influence on antibody-induced cellular phagocytosis against CMV  
774 <sup>132</sup>. Two phase I clinical trials are active but not recruiting <sup>5</sup>to assess the reactogenicity, safety,

775 and immunogenicity of the mRNA-1647 CMV vaccine (NCT05105048 and NCT05397223). A<sup>39</sup>  
776 phase II clinical trial is recruiting to assess the efficacy, safety, and immunogenicity of the  
777 mRNA-1647 CMV vaccine (NCT05683457). A phase I/II clinical study<sup>1</sup> is also recruiting to  
778 assess<sup>21</sup> the safety and immunogenicity of the mRNA-1647 CMV vaccine in healthy individuals  
779 9 to 15 years of age and individuals 16 to 25 years of age<sup>30</sup> (NCT05575492). A phase III clinical  
780 study is recruiting<sup>21</sup> healthy participants 16 to 40 years of age<sup>72</sup> to assess the efficacy, safety, and  
781 immunogenicity of the mRNA-1647 CMV vaccine (NCT05085366). A phase I trial<sup>80</sup> evaluating  
782 the safety, reactogenicity as well as immunogenicity of mRNA-1647 and mRNA-1443 CMV  
783 vaccines has been completed in healthy adults, but the findings are not disclosed  
784 (NCT03382405). A dose-finding study<sup>29</sup> to assess the safety and immunogenicity of CMV  
785 vaccine mRNA-1647 has also been completed in healthy adults, but the results are not reported  
786 (NCT04232280). Together, no clinical data have been reported regarding<sup>18</sup> the safety,  
787 reactogenicity, safety, and immunogenicity of CMV mRNA vaccines to date. The publication  
788 of these data has the potential to offer significant insights for the advancement of anti-CMV  
789 mRNA vaccines.

790

### 791 3.6 mRNA vaccines against respiratory syncytial virus

792 Respiratory syncytial virus (RSV) is an enveloped virus belonging to the Pneumovirus genus<sup>26</sup>  
793 within the Paramyxoviridae family<sup>133,134</sup>. It is the most common<sup>143</sup> pathogen in infants and young  
794 children causing acute lower respiratory infection. Older adults, especially those with deficient  
795 immunity, are also susceptible to RSV. The fusion protein (F protein) is targeted by the human  
796 immune system against RSV; thus, it is usually selected as the antigen for vaccine development.  
797 However, when RSV attaches to the targeted cell, the F protein is modified in a prefusion form,  
798 which hides the potent neutralizing epitopes, leading to the immune evasion of RSV. In 2020,  
799 Espeseth *et al.* tested mRNA vaccines encoding RSV F proteins with different conformations,



and the results demonstrated that the native form of RSV F protein generated high titers of neutralizing antibodies against both prefusion- and postfusion-specific epitopes<sup>135</sup>. The mRNA vaccine encoding the F protein with prefusion stabilizing mutations can generate a humoral response toward prefusion-specific epitopes. However, the stabilizing mutations do not generate higher titers of neutralizing antibody or enhanced T-cell response compared with the effect of the mRNA vaccine encoding the native F protein<sup>135</sup>. A phase I study is recruiting individuals aged 5 months to <24 months to evaluate the safety and immunogenicity of mRNA-1365 and mRNA-1345 (NCT05743881). A phase I trial is currently in progress, focusing on the tolerability and reactogenicity of mRNA-1345 in various populations (NCT04528719). This includes younger adults, women of child-bearing potential, older adults, and RSV-seropositive children. The study involves different dosing regimens, including single injections of up to 5 dose levels in younger adults, 3 injections of the middle dose level administered with a 56-day interval in younger adults, a booster injection around 12 months following the primary injection in older adults, and 3 injections of 1 of 2 dose levels given 56 days apart in RSV-seropositive children. Although infants and young children are frequently infected by RSV, few clinical trials have been performed at this stage to date, but they have been launched for adults. Moderna developed an mRNA vaccine named mRNA-1777 that encodes RSV F protein stabilized in the prefusion conformation, which became the first RSV mRNA vaccine entering a phase I clinical study for assessing its safety, tolerability, and immunogenicity<sup>136</sup>. A total of 72 healthy young adults from 18 to 49 years old and 107 healthy old adults from 60 to 79 years old were enrolled in this study, randomly divided into two groups and treated with mRNA-1777 or placebo. The safety profile of mRNA-1777 was favorable, with no reports of serious adverse events and good tolerability observed. mRNA-1777 induced geometric mean titers of neutralizing antibody peaking from day 29 to 60 postinjection and declining over time. Intracellular cytokine staining of IFN- $\gamma$ , IL-2, and TNF- $\alpha$  also showed enhanced CD4<sup>+</sup> T-cell responses in both young and old

825 participants. These results are promising for use in large randomized, placebo-controlled trials  
826 involving vulnerable adult populations in the future <sup>136</sup>. In addition, multiple clinical trials have  
827 been performed. <sup>49</sup> A phase I study is recruiting adults 50 to 75 years old for assessing <sup>72</sup> the safety,  
828 reactogenicity, and immunogenicity of the mRNA-1045 RSV vaccine (NCT05585632). An  
829 observational study is currently recruiting participants <sup>4</sup> to assess the real-world efficacy of the  
830 Moderna mRNA-1345 vaccine in preventing <sup>44</sup> lower respiratory tract disease caused by RSV, as  
831 well as to investigate additional health and economic outcomes (NCT05572658). <sup>49</sup> A phase I/II  
832 study is currently underway to evaluate the safety and immunogenicity of a single intramuscular  
833 injection of 3 dose levels of an RSV mRNA vaccine candidate formulated with two different <sup>24</sup>  
834 LNPs (i.e., LNP containing CL-0059 or CL-0137) in healthy adults aged 18-50 years and 60  
835 years and older (NCT05639894). A phase II/III study is recruiting <sup>67</sup> adults aged 60 years and  
836 older <sup>44</sup> to assess the safety and tolerability of the mRNA-1345 vaccine and the vaccine's ability  
837 to prevent <sup>18</sup> the first episode of RSV-associated lower respiratory tract disease in this population  
838 (NCT05127434). Although multiple clinical studies have been launched, almost all are still at  
839 an early stage, and the prophylactic effects of the mRNA vaccine against acute infection of the  
840 lower respiratory tract remain to be defined.

841

### 842 <sup>94</sup> 3.7 mRNA vaccines against varicella-zoster virus

843 Varicella zoster virus (VZV), also referred to as human herpesvirus 3, is an alphaherpesvirus  
844 with a double-stranded DNA genome that is widely distributed in the human population <sup>104</sup>.  
845 Primary VZV infection leads to varicella (chickenpox), and it becomes latent in ganglionic  
846 neurons. Latent VZV is reactivated in severe cases due to decreased cellular immunity against  
847 VZV, causing postherpetic neuralgia, which may lead to unbearable pain lasting for months and  
848 affect the quality of life of patients. VZV encodes 10 glycoproteins: ORFS/L, gK, gN, gC, gB,  
849 gH, gM, gL, gI and gE <sup>137-139</sup>. In 2020, Monslow *et al.* developed <sup>13</sup> an LNP-enclosed mRNA

850 vaccine encoding the VZV gE antigen, and its efficacy was compared with that of two other  
851 vaccines approved on the market, including one with a live attenuated virus and one with a  
852 subunit protein. Rhesus monkeys were divided into five groups and treated with VZV gE  
853 subunit protein, live-attenuated VZV, and mRNA VZV vaccine at different doses. The results  
854 revealed the safety of the two 50 µg mRNA VZV vaccines and <sup>152</sup> the ability to trigger a potent  
855 humoral and cellular immunity comparable to that of the 50 µg subunit protein vaccine,  
856 indicating that the mRNA vaccine is a suitable platform for future production of the VZV  
857 vaccine <sup>140</sup>. Although the translatability of the results was promising, more clinical and  
858 preclinical investigations focused on the effectiveness and safety of the vaccine are still urgently  
859 needed.

860

### 861 3.8 mRNA vaccines against rabies virus

862 Rabies virus <sup>84</sup> is a negative-stranded RNA virus of the Rhabdoviridae family causing rabies, a  
863 zoonotic viral disease with nearly 100% fatality <sup>141</sup>. The rabies virus binds to its cellular target  
864 through the surface glycoprotein RABV-G, gaining access to the peripheral nerves and the  
865 central nervous system. In 2016, Schnee *et al.* tested a vaccine composed of mRNA encoding  
866 RABV-G in mice and domestic pigs and discovered 2 doses of this vaccine induced virus-  
867 specific neutralizing titers  $\geq 0.5$  IU/ml and an increased proportion of virus-specific CD4<sup>+</sup> T  
868 cells <sup>66</sup>. Antibody titers in mice vaccinated with 20 µg and 80 µg mRNA vaccine remained  
869 stable throughout one year of measurement once a month, with mean titers of approximately  
870 40 IU/ml. The vaccinated mice were protected against intracerebral rabies virus infection,  
871 suggesting the satisfying immunogenicity of the mRNA vaccine <sup>66</sup>. In 2017, Alberer *et al.*  
872 performed <sup>175</sup> the first phase I clinical study in Germany using the mRNA rabies vaccine CV7201  
873 <sup>142</sup>. A total of 101 participants aged 18 to 40 were enrolled and vaccinated, <sup>45</sup> and the results  
874 demonstrated that CV7201 was generally safe and well tolerated, with only one vaccine-related



875 serious side effects (moderate Bell's palsy). RABV-G-specific IgM and IgG titers peaked at  
876 days 21 and 42 postinjection. A significant enhancement in serum IgG was found after the 1-  
877 year boost, suggesting the establishment of an immune memory response in participants.  
878 RABV-G-specific CD4<sup>+</sup> T cells transiently enhanced after vaccination and declined to baseline  
879 levels three months after injection <sup>142</sup>. Since the phase I clinical trial using mRNA rabies vaccine  
880 showed satisfying outcomes, future studies should focus on increasing antibody titers inducing  
881 a longer immune response to potentially help the production of cheaper and more available  
882 rabies vaccines to meet the needs of public health.

883

#### 884 **4. mRNA vaccines in cancers**

885 mRNA vaccines in cancers are usually applied in a therapeutic setting instead of a prophylactic  
886 approach in infectious disease <sup>143</sup>. Indeed, it is typically designed to encode tumour-associated  
887 antigens (TAAs) or neoantigens to activate antitumour immune responses <sup>144</sup>. To date, numerous  
888 clinical trials investigating the effect of the mRNA vaccine against various cancers <sup>103</sup> have been  
889 registered in the U.S. National Library of Medicine (ClinicalTrials.gov), including melanoma,  
890 brain <sup>95</sup> cancer, non-small cell lung cancer (NSCLC), ovarian cancer, prostate cancer, blood  
891 system cancer, digestive system cancer, and breast cancer (Table 2 and Figure 4).

892

#### 893 **4.1 mRNA vaccines against melanoma**

894 Melanoma arises from the malignant conversion of melanocytes that are widely distributed in  
895 the body (e.g., skin, mucosa, uvea, inner ear, and rectum). Cutaneous melanoma is the most  
896 common type that accounts for ~1.7% of all newly diagnosed primary malignancies,  
897 responsible for ~0.7% of all cancer mortality worldwide <sup>145</sup>. DC-based mRNA vaccines are  
898 mostly used to combat melanoma. As early as 1996, Boczkowski *et al.* performed adoptive  
899 mRNA-pulsed DC transfer, discovering that a DC-pulsed mRNA vaccine encoding ovalbumin

(OVA) protected mice from OVA-expressing tumour cells and significantly reduced lung metastases in a B16/F10.9 tumour model<sup>146</sup>. In recent years, diverse DC-based mRNA vaccines<sup>1</sup> have been tested in melanoma patients<sup>1</sup>. Gaudernack *et al.* isolated autologous total mRNA from biopsied melanoma tissue and introduced it into DCs via electroporation<sup>147,148</sup>. Then, melanoma patients were vaccinated with autologously derived tumour mRNA-transfected DCs, causing the induction of a wide range of T-cell responses<sup>36</sup>. Several antigens have been used as targets for mRNA vaccine development, such as MAGE-A3, MAGE-A2, gp100, and tyrosinase. MAGE-A3<sup>147</sup> and MAGE-C2 are exclusively expressed in germ cells and tumour cells (including melanoma cells), while tyrosinase and gp100 are widely expressed in both tumour and normal tissue. Aarntzen *et al.* utilized mRNA to electroporate monocyte-derived DCs to encode gp100 and tyrosinase<sup>149,150</sup>. These monocyte-derived DCs were then administered to 45 patients with stage III and IV melanoma<sup>159</sup>. The study demonstrated notable CD4<sup>+</sup> and CD8<sup>+</sup> T-cell responses specific to tumour antigens, suggesting the potential effectiveness of mRNA-electroporated DC vaccines for treating melanoma. Immunological adjuvants are usually used to stimulate and amplify the immune responses to the targeted antigens to regulate the *in vivo* immunogenicity of the mRNA vaccine. TriMix has been mostly used as a DC-based mRNA vaccine against melanoma because it encodes the activation stimulator CD40L (CD4<sup>+</sup> T-cell activator), the costimulatory molecule CD70 (CD8<sup>+</sup> T-cell activator), and the constitutively active TLR 4 (DC antigen presentation promotor). Wilgenhof *et al.* described a phase IB trial that enrolled 15 advanced melanoma patients who were subjected to vaccination with autologous monocyte-derived DCs electroporated with synthetic mRNA (TriMixDC-MEL)<sup>121</sup>. The report revealed that the mRNA encoded CD40L, TLR4, CD70, HLA-II targeting signal, and a TAA (MAGE-A3, MAGE-C2, tyrosinase, or gp100)<sup>60</sup>. After vaccination, two patients exhibited a complete response, two patients exhibited a partial response, and all patients showing an objective response had a progression-free disease > two years. In addition, Jansen *et al.* showed a phase

925 II trial using <sup>79</sup>TriMixDC-MEL as an adjuvant treatment in stage III/IV melanoma <sup>152</sup>. The  
926 findings of the study arm displayed 71% of patients <sup>22</sup>were free of disease as compared to 35%  
927 in the control arm one year later. Given that the expression of PD-1/PD-L1 can compromise the  
928 efficacy activated by mRNA vaccines, one study investigated <sup>176</sup>the effect of combined treatment  
929 of TriMixDC-MEL and an immune checkpoint inhibitor (ipilimumab) in stage III/IV melanoma  
930 (NCT01302496) <sup>153</sup>. The treatment elicited objective long-term clinical responses, with an  
931 overall survival of 28% (11/39) and progression-free survival of 18% (7/39) after 5 years of  
932 follow-up. Eighty percent (12/15) of patients with immune monitoring were vaccine responders,  
933 and among them, 10 showed T-cell responses against at least two antigens.

934  
935 Although *in vitro* transcription-based forms are less common than DC-based forms, the  
936 development in molecular biotechnology has made this form feasible for cancer treatment.  
937 BioNTech, GenenTech, and Moderna are leading companies in the pharmaceutical industry, and  
938 as such, they have announced clinical updates regarding <sup>22</sup>*in vitro* transcription-based vaccines  
939 against melanoma. In 2004, Weide <sup>7</sup>*et al.* performed a phase I/II study to assess the safety and  
940 efficacy of a protamine-mRNA vaccine encoding TAAs (gp100, <sup>2</sup>Melan-A, Tyrosinase, MAGE-  
941 <sup>56</sup>A1, MAGE-A3, and survivin) in a group of 21 patients with metastatic melanoma <sup>154</sup>. After  
942 vaccination, one patient among 7 <sup>1</sup>with measurable disease experienced a complete response.  
943 <sup>98</sup>Foxp3<sup>+</sup>/CD4<sup>+</sup> regulatory T cells or myeloid suppressor cells were significantly reduced <sup>98</sup>in the  
944 peripheral blood of vaccinated patients with or without keyhole limpet hemocyanin,  
945 respectively. Two of 4 immunologically evaluable patients displayed a reproductive elevation  
946 in vaccine-specific T cells. BNT111 is a liposomal RNA vaccine <sup>1</sup>encoding four TAAs, MAGE-  
947 A3, <sup>1</sup>NY-ESO-1, PTEN, and tyrosinase, and its safety and effectiveness were evaluated in 2015  
948 after intravenous administration in a <sup>1</sup>phase I trial (Lipo-MERIT, NCT02410733) <sup>155</sup>. This study  
949 recruited 89 patients, with 42 suffering from measurable stage III/IV melanoma. Three patients

950 in the BNT111 monotherapy group exhibited a partial response, seven exhibited stable disease,  
951 and one exhibited complete metabolic remission of metastatic lesions, as revealed by PET/CT  
952 imaging. The combination of BNT111 with PD-1 blockade revealed that six of 17 patients  
953 experienced a partial response. The disease was controlled for a long time in most of the patients  
954 with partial response or stable disease in both groups during a follow-up period of up to two  
955 years. The observed clinical response was accompanied by the activation of CD4<sup>+</sup> and CD8<sup>+</sup> T-  
956 cell immune responses specifically targeting the vaccine antigens. Additionally, the therapeutic  
957 adverse events experienced by patients were predominantly mild to moderate flu-like symptoms  
958 such as fever and chills. These symptoms were mostly observed early on, of short duration,  
959 easily manageable, and typically resolved within 24 hours. At present, BNT111 is being used  
960 in an ongoing phase II trial for the treatment of PD-1 inhibitor refractory/recurrent and  
961 unresectable stage III/IV melanoma (NCT04526899). On November 19, 2021, BioNTech was  
962 granted priority eligibility for the treatment of melanoma with BNT111 by the FDA. In 2022,  
963 Sittplangkoon *et al.* studied the immunogenicity and antitumour responses of mRNA that  
964 encodes tumour antigens with varying levels of N1-methylpseudouridine modification in a B16  
965 melanoma model<sup>156</sup>. The mRNA vaccine encoding OVA induced significant production of IFN-  
966 I and the maturation of DCs, with a negative correlation observed with elevating percentages  
967 of N1-methylpseudouridin modification. Unmodified OVA-LNPs significantly reduced tumour  
968 growth, prolonged survival, and increased intratumoural CD40<sup>+</sup> DCs and the frequency of  
969 granzyme B<sup>+</sup>/IFN- $\gamma$ <sup>+</sup>/TNF- $\alpha$ <sup>+</sup> polyfunctional OVA peptide-specific CD8<sup>+</sup> T cells in a B16-OVA  
970 murine melanoma model. The robust antitumour effects of unmodified OVA-LNPs was also  
971 found in the lung metastatic tumour model. In addition, the mRNA vaccine was also evaluated  
972 using B16 melanoma neoantigens (Pbk-Actn4), leading to a delay in tumor growth.  
973 Additionally, in 2017, Fernandez *et al.* launched a phase I trial to evaluate the immunogenicity  
974 and safety of the ECI006 vaccine in melanoma (a combination of TriMix and TAA-encoding

975 mRNA (NCT03394937). Nevertheless, the abovementioned mRNA vaccines are designed to  
976 target TAAs, and central tolerance is inevitable. Therefore, personalized mRNA vaccines are  
977 warranted to overcome this challenge.

978

979 The initial application of personalized RNA mutanome vaccines in human melanoma was  
980 reported in 2017<sup>157</sup>. The authors identified nonsynonymous mutations in 13 melanoma patients  
981 by RNA and exome sequencing, and among them, ten per patient were selected to construct two  
982 synthetic RNAs according to the affinity to HLA class I/II. All patients were treated with a  
983 minimum of eight and a maximum of 20 neoepitope vaccine injections. Increased responses  
984 were observed in <sup>1</sup>one-third of patients who previously showed weak responses against  
985 neoepitopes, while *de novo* responses were observed in the remaining patients. Eight patients  
986 with no <sup>1</sup>radiologically detectable lesions at the beginning of the vaccination generated a  
987 vigorous immune response and showed progression-free disease for 12-23 months. Moreover,  
988 vaccination induced a significant decrease in the cumulative rate of metastatic events and  
989 sustained progression-free survival. When these RNA mutanome vaccines were used in  
990 combination with PD-1 blockade, a <sup>2</sup>third of patients experienced a complete response to the  
991 vaccination. The study revealed that the vaccination was well tolerated, with seven patients  
992 showing vaccine-related immune responses. Apart from this trial, another phase I multicenter  
993 study tested mRNA-4157 (a lipid-encapsulated personalized vaccine that encodes neoantigens  
994 selected based on a proprietary algorithm) monotherapy or combined with pembrolizumab in  
995 resected solid tumours (including melanoma)<sup>149</sup>. Among the 13 <sup>22</sup>patients in the monotherapy  
996 arm that included <sup>156</sup>three suffering from melanoma, 12 remained disease-free after a median  
997 follow-up of eight months, and no drug-related adverse events of more than grade two were  
998 observed. Moreover, GenenTech and BioNTech started a series of phase I and II trials for  
999 personalized lipid-encapsulated mRNA vaccines combined <sup>1</sup>with atezolizumab or



1000 pembrolizumab (e.g., NCT03289962 and NCT03815058) <sup>149</sup>. All these pieces of evidence  
1001 demonstrate that personalized mRNA vaccines in combination with other anticancer  
1002 approaches may pave the way for the treatment of melanoma.

1003  
1004 <sup>50</sup> Diverse mRNA vaccines have been developed for the treatment of melanoma, displaying  
1005 potential therapeutic efficacy in clinical studies. <sup>9</sup> However, no mRNA vaccine has been officially  
1006 approved for the treatment of melanoma. The combination of mRNA vaccines with other  
1007 therapeutic strategies may further enhance their effectiveness and promote their potential for  
1008 approval.

#### 1009 1010 **4.2 mRNA vaccines against brain cancer**

1011 Primary brain cancer is less frequent in adults, representing 1-2% of all cancer types worldwide  
1012 <sup>158,159</sup>. Malignant glioma is the most common subtype in brain cancer, with glioblastoma being  
1013 the most aggressive subtype <sup>160</sup>. The 5-year survival of brain cancer depends on its malignancy,  
1014 with an approximate value of 32% in malignant glioma and approximately 5% in glioblastoma  
1015 in the United States <sup>161</sup>. DC-pulsed tumour mRNA vaccine is one of the first mRNA forms  
1016 applied in human malignant glioma <sup>162</sup>. Two studies involved the application of autologous  
1017 tumour mRNA-loaded DCs. The first is a clinical study that recruited five patients who  
1018 underwent subtotal removal of malignant glioma without receiving other therapy <sup>163</sup>. All  
1019 patients exhibited a specific CD8<sup>+</sup> cytotoxic T-cell response after treatment with autologous  
1020 tumour mRNA-loaded DCs, and among them, three showed potent cytolytic activity against  
1021 autologous glioma cells. The other study recruited seven glioblastoma patients in a <sup>142</sup> phase I/II  
1022 study for evaluating the efficacy of DC-pulsed cancer stem cell mRNA <sup>164</sup>. Two vaccinations  
1023 were performed in all patients in the first week after the end of the standard chemoradiotherapy,  
1024 followed by one weekly vaccination for three weeks and then one vaccination or temozolomide

every two weeks. Although tumour recurrence was observed in five patients (at 10, 15, 17, 22, and 29 months after the treatment), six patients in the control group died before the first patient experiencing recurrence in the vaccinated group, and three of the seven survived for more than 1000 days. To exert more specific antitumour effects, a randomized and blinded clinical study on glioblastoma used a DC-pulsed mRNA vaccine encoding CMV pp65 since this protein is expressed in > 90% of glioblastomas but not in the surrounding normal tissue <sup>165</sup>. The authors assessed the impact of vaccine site preconditioning on DC migration. Twelve patients were randomly classified into two groups and subjected to unilateral vaccine site preconditioning with tetanus/diphtheria toxoid or unpulsed autologous DCs. Treatment with tetanus/diphtheria and mRNA vaccines significantly prolonged both overall and progression-free survival, and 50% of patients were alive for more than 36.6 months. A pp65-specific immune response was detected for several months in all the long-term survivors, and the increased pp65-specific interferon- $\gamma$  levels were correlated with overall survival. A subsequent DC migration study involved 100 patients with resected, grade IV glioblastoma, but the results were not provided (NCT02366728). Two clinical trials are recruiting patients to investigate the effectiveness of human CMV pp65-LAMP in glioblastoma, and the results are not disclosed (NCT02465268, NCT03688178). In addition, a pp65-LAMP mRNA-loaded <sup>155</sup> 1,2-dioleoyl-3-trimethylammonium-propane (DOTAP) liposome vaccine is being tested in high-grade glioma and glioblastoma in a phase I study, and the results are not published (NCT04573140). Of note, mRNA vaccines in malignant glioma mainly encode TAAs, and whether neoantigen-based <sup>1</sup> mRNA vaccines together with immune checkpoint inhibitors could show superior efficacy in glioma remains to be investigated.

#### **4.3 mRNA vaccines against <sup>31</sup> non-small cell lung cancer**

Lung cancer is the second most frequent cancer and the leading cause of cancer mortality

1050 worldwide<sup>158</sup>, with NSCLC representing 85% of all lung cancers<sup>166</sup>. The 5-year survival rate  
1051 is about 60% in cases of resectable diseases, approximately 33% in cases of unresectable  
1052 regional disease, and 6.3% in cases of extended disease with metastasis<sup>166,167</sup>. CV9201 and  
1053 BI1361849 (CV9202) are two mRNA-based vaccines that were clinically tested in NSCLC<sup>168</sup>.  
1054 CV9201 is composed of a protamine-formulated sequence-optimized mRNA that encodes five  
1055 NSCLC-associated antigens: MAGE-C1, MAGE-C2, NY-ESO-1, 5T4 and survivin. CV9202  
1056 has the same composition as CV9201 with the addition of mucin-1. Multiple clinical studies  
1057 have been initiated to investigate their efficacy in NSCLC. In 2019, Sebastian *et al.* reported a  
1058 phase I/IIA study using CV9201 in stage IIIB/IV NSCLC<sup>169</sup>. A total of 46 locally advanced (n  
1059 = 7) or metastatic (n = 39) NSCLC patients with stable disease after first-line treatment were  
1060 recruited and subjected to five intradermal CV9201 injections (400-1600 µg of mRNA). The  
1061 maximum dose was recommended in phase IIA, all doses were well tolerated, and most adverse  
1062 events were mild-to-moderate reactions in the injection site and flu-like symptoms. An antigen-  
1063 specific immunity was observed in 63% of assessable patients in phase IIA, and 60% (18/30)  
1064 showed more than twofold activated IgD<sup>+</sup>CD38<sup>hi</sup> B cells. A total of 31% (9/29) and 69% (20/29)  
1065 of patients showed stable and progressive disease, respectively. The median overall and  
1066 progression-free survival rates were five months and 10.8 months, respectively, and the 2- and  
1067 3-year survival rates were 26.7% and 20.7%, respectively. In the same year, Papachristofilou *et*  
1068 *al.* reported a phase IB trial evaluating the effectiveness of CV9202 in combination with local  
1069 radiation treatment in 26 patients suffering from stage IV NSCLC with stable disease or partial  
1070 response after standard first-line treatment<sup>170</sup>. These patients were classified into three strata:  
1071 1: no nonsquamous NSCLC, partial response/stable disease after treatment with four or more  
1072 cycles of pemetrexed- and platinum-based therapy and no mutation of EGFR (n = 16); 2:  
1073 squamous NSCLC, partial response/stable disease after four or more cycles of nonplatinum  
1074 compound and platinum-based treatment (n = 8); and 3: nonsquamous NSCLC, stable

1075 disease/partial response after treatment for 3-6 months<sup>15</sup> with EGFR-tyrosine kinase inhibitor,  
1076 EGFR mutation (n = 2). Patients received two injections of CV9202, followed by radiation  
1077 therapy (4 × 5 Gy). Patients<sup>25</sup> in strata 1 and 3 subsequently were administrated with three further  
1078 treatments with CV9202, while those in stratum 2 received four, after which all patients were  
1079 vaccinated with CV9202<sup>25</sup> at 3-week intervals for the first six months and then every six weeks  
1080 thereafter. Vaccination of CV9202 was continued until disease progression required<sup>25</sup> systemic  
1081 second-line treatment or in cases of patients encountering unacceptable toxicity. Patients in  
1082 strata 1 and 3 received<sup>15</sup> maintenance pemetrexed or continued EGFR-tyrosine kinase inhibitor  
1083 therapy, respectively. An antigen-specific immune response was detected in all three strata (a  
1084 total of 25 evaluable patients), and at least a twofold increase in the magnitude of the immune  
1085 response against one or more of the CV9202 antigens compared to baseline was observed in 20  
1086 patients. Ten patients showed at least a twofold increase in functional CD8<sup>+</sup>/CD4<sup>+</sup> T cells  
1087 compared to the value at baseline. Twelve patients (12/26) exhibited stable disease, and one  
1088 showed a partial response and was also treated with pemetrexed maintenance. The most  
1089 common CV9202-related<sup>80</sup> side effects were flu-like symptoms and reactions at the injection site,  
1090 with three patients developing grade 3 (fatigue and pyrexia). Recently, a phase I/II study<sup>129</sup>  
1091 (NCT03164772) completed the assessment of the safety and effectiveness of CV9202 in  
1092 combination with the immune checkpoint inhibitor durvalumab targeting PD-L1 and  
1093 tremelimumab targeting CTLA-4 for the treatment of NSCLC, but the results are not published.  
1094 In addition, a clinical study (NCT03908671) involving patients with NSCLC and advanced  
1095 esophageal cancer for the use of a personalized mRNA vaccine that encodes tumour-specific  
1096 antigens has been registered. Although a fraction of patients with NSCLC experience beneficial  
1097 effects from treatment with the mRNA vaccine, the overall survival is still limited, as reported  
1098 in published studies. Further optimization of the mRNA vaccine and the selection of a suitable  
1099 combination therapy are required to enhance its efficacy. In addition, only a few studies have

been completed with published findings, and more clinical trials are needed for future application of mRNA vaccines in NSCLC.

#### 4.4 mRNA vaccines against ovarian cancer

Ovarian cancer is one of the most dangerous gynecological cancers, with around 314 000 new cases and 207 000 mortalities in 2020 worldwide<sup>158</sup>. It accounts for ~5% of female cancer-related death and has become the fifth leading cause of female cancer-related death global. A DC-pulsed mRNA vaccine encoding folate-receptor- $\alpha$  (FR- $\alpha$ ) was used in 2004 for treating relapsed metastatic ovarian cancer<sup>171</sup>. The patient involved in this study was a 62-year-old woman diagnosed with advanced serous papillary ovarian cancer IIIc with widespread peritoneal carcinomatosis and increased CA-125. The patient was subjected to two tumour debulking procedures and experienced two tumour relapses. The vaccine treatment with autologous DCs engineered with mRNA encoding FR- $\alpha$  started at the moment of the second relapse, with a total of ten vaccinations administered at four-week intervals. The CT showed a partial response when the tumour volume was compared before the treatment and three months after the last vaccination. The CT at 16 months of follow-up revealed a regression of over 50% of the lymph-node metastases, and consistently, the vaccinations induced an FR- $\alpha$ -specific immune response. After six vaccinations, the IFN- $\gamma$  produced by FR- $\alpha$ -stimulated CD8<sup>+</sup> cells and FR- $\alpha$ -stimulated CD4<sup>+</sup> cells increased 30-fold and 15-fold compared to the amount in the prevaccination samples, respectively. Similarly, granzyme B was increased after vaccination compared to the amount in the prevaccination samples. No systemic or local side reactions associated with the therapy were observed, indicating that the vaccination was well tolerated. Another publication reported the application of DC-pulsed mRNA encoding WT1 in ovarian carcinoma and carcinosarcoma<sup>172</sup>. Two patients, one with serous ovarian cancer and the other with ovarian carcinosarcoma, received four weekly vaccinations, which induced increased



1125 CD137<sup>+</sup> <sup>131</sup>antigen-specific T cells, IL-2, and IFN- $\gamma$  in ovarian carcinoma and CD137<sup>+</sup> antigen-  
1126 specific <sup>10</sup>T cells, IL-2, and TNF- $\alpha$  in ovarian carcinosarcoma. Unfortunately, <sup>57</sup>the disease  
1127 progressed after four vaccinations, and the patient with ovarian carcinoma survived for 19  
1128 months, while the patient with ovarian carcinosarcoma survived for 12 months after the end of  
1129 vaccine administration. In that same year, a phase I study was conducted to assess <sup>57</sup>the safety of  
1130 active immunotherapy using fully mature, TERT-mRNA, and survivin-peptide double-loaded  
1131 DCs in 15 patients with advanced epithelial ovarian cancer. However, <sup>57</sup>the results were not  
1132 published despite the completion of the study (NCT01456065). A first-in-human, open-label  
1133 phase I study is currently recruiting ovarian cancer patients for a liposome-formulated mRNA  
1134 vaccine together with (neo)-adjuvant chemotherapy (NCT04163094). Regrettably, the phase  
1135 I/II trial that utilized autologous <sup>74</sup>DCs loaded with amplified ovarian cancer stem cell mRNA,  
1136 hTERT, and survivin in recurrent platinum-sensitive epithelial ovarian cancer patients was  
1137 terminated in 2021 (NCT01334047), with no results disclosed. The utilization of mRNA  
1138 vaccines in ovarian cancer is still in its early stages, and <sup>31</sup>the number of patients enrolled in  
1139 clinical trials remains limited. The efficacy of mRNA vaccines in ovarian cancer should be  
1140 further explored in a larger number of patients for a better evaluation of their efficacy.

1141

#### 1142 <sup>70</sup>**4.5 mRNA vaccines against prostate cancer**

1143 Prostate cancer is the second most common cancer and the fifth leading cause of cancer-related  
1144 mortality among <sup>70</sup>men globally, with approximately 10 million men diagnosed <sup>158,173</sup>. It causes  
1145 over 400,000 mortalities annually worldwide, which is projected to reach over 800,000 deaths  
1146 annually by 2040 <sup>158,173-175</sup>. <sup>40</sup>Islam *et al.* developed an <sup>2</sup>adjuvant-pulsed mRNA vaccine  
1147 nanoparticle containing an OVA-coded mRNA and a palmitic acid-modified TLR7/8 agonist  
1148 R848 (C16-R848) encapsulated with a lipid-polyethylene glycol shell <sup>176</sup>. This vaccine  
1149 successfully preserved the adjuvant activity of the encapsulated C16-R848, and exhibited a

notable improvement in mRNA transfection efficacy, with a rate exceeding 95%. This high transfection efficacy led to enhanced presentation of the OVA mRNA-derived antigen on MHC class I molecules in antigen-presenting cells. Vaccination elicited potent adaptive immune responses by improving the extension and infiltration of OVA-specific CD8<sup>+</sup> T cells in OVA-expressing syngeneic allograft mouse models of prostate cancer and suppressed tumour growth when offered postengraftment (60% reduction vs. control). CV9103 encodes four TAAs in prostate cancer: PSA, PSMA, PSCA, and STEAP, and it is the first-in-human tested mRNA vaccine<sup>177</sup>. Two clinical trials on the use of CV1903 in prostate cancer have been conducted. One (NCT00831467) investigated the effect of three increasing doses (256 mg, 640 mg, and 1280 mg total mRNA) in cohorts of three to six patients with prostate cancer, but the results are not published. The phase I of another open, phase I/II, uncontrolled, prospective study (NCT00906243) confirmed the safety of the dose of 320 µg RNA per antigen, providing a recommended dose for phase IIa to explore the immunological activity of that dose. Forty-four patients with increased PSA and mostly existing metastases (> 80%) were recruited, and the results showed a superior immunogenicity rate induced by the vaccine in prostate cancer patients; antigen-specific T cells were observed in approximately 80% of patients independently of their HLA background, and approximately 58% reacted against multiple antigens. The PSA levels were stabilized in individual patients and dropped by more than 85% in one patient. One dose-limiting toxicity, urinary retention, was observed in six patients after the use of the highest dose. The most frequent adverse events were a reaction at the injection site or flu-like symptoms (e.g., chills and fever).

A subsequent clinical evaluation was performed due to the favorable safety profile and strong antigen-specific immune responses of CV9103 to assess two additional antigens, PAP and mucin-1, developing a new vaccine termed CV9104 that was used in two clinical studies<sup>177</sup>.

The first trial (NCT01817738) enrolled patients with castrate refractory metastatic prostate cancer who were subjected to surgery or androgen suppression therapy (by GNRH agonist or antagonist). The vaccination started at a dose of 1920 µg in weeks 1, 2, and 3, continued in weeks 5, 7, 9, 12, 15, 18, and 24, then every six weeks for 12 months and every three months thereafter until treatment discontinuation. The overall survival from the time of randomization was up to 3.5-4 years. The second trial using CV9104 (NCT02140138) was in an open-label randomized trial involving 35 high-risk and intermediate-risk patients with prostate cancer. Patients received four doses of CV9104 vaccine in weeks 1, 2, 3, and 5, and then, these patients underwent radical prostatectomy over one but within two weeks. The primary outcome was the evaluation of the antigen-specific cellular and humoral immune response to the vaccine, while the secondary outcome was the measurement of the incidence and severity of the adverse effects and the changes in PSA serum levels. However, no clinical therapeutic results have been provided thus far. Together, the mRNA vaccines against prostate cancer are mostly at an attempt stage, and the potential values in survival require more support from clinical results.

#### 4.6 mRNA vaccines against blood system cancer

Hematological malignancies encompass a range of diseases involving the abnormal proliferation of hematopoietic stem cells, including leukemia, myeloma and lymphoma<sup>178</sup>. Leukemia ranks as the first leading cause of cancer death among blood diseases and the tenth leading cause of cancer deaths overall worldwide ([www.iarc.fr](http://www.iarc.fr)) according to the global cancer statistics for 2020 released by the International Agency for Research on Cancer. The common leukemia types include acute myeloid leukemia (AML), chronic myeloid leukemia, chronic myelomonocytic leukemia, chronic neutrophilic leukemia, and atypical chronic myeloid leukemia<sup>179</sup>. mRNA vaccines have mainly been applied to AML in blood system cancer thus far. In 2005, Jarnjak-Jankovic showed that a DC-pulsed tumour mRNA vaccine triggered

40 specific T-cell responses against leukemia cells *in vitro*<sup>180</sup>. Subsequently, Driessche<sup>2</sup> *et al.* reported a phase I clinical study with dose escalation of an autologous DC-pulsed mRNA vaccine encoding WT1 in 10 patients with AML<sup>181</sup>. Patients were administered intradermal injections every two weeks, receiving 5, 10, or 20×10<sup>6</sup> DC in the ventromedial region of the thigh or upper arm. The four doses were well tolerated by all patients, and no autoimmune or acute toxicities were observed throughout the entire trial. This team further showed the results of the use of the above vaccine<sup>146</sup> in a phase I/II study on AML patients<sup>182</sup>. Patients with hematological remission after chemotherapy were enrolled one month after polychemotherapy for four biweekly vaccinations. Five (50%) patients (two of them refractory to chemotherapy) showed complete disease remission (absence of blasts in blood and less than 5% blasts in the bone marrow) after intradermal vaccination, with the myeloblast percentage decreasing to a normal level. Out of the five individuals, three exhibited long-term response with complete remission that endured for over three years. A significantly positive correlation was found between the long-term response and WT1-specific CD8<sup>+</sup> T-cell number. This study was performed again two years later on more patients, 17 in total, and among them, eight showed a complete response with a median relapse-free survival of 47 months<sup>183</sup>. On this basis, this group reported a phase II trial about a DC-pulsed mRNA vaccine encoding WT1 as postremission treatment in 30 AML patients at high risk of relapse<sup>184</sup>. Thirteen patients showed an antileukemic response, with five-year overall and relapse-free survival rates of 53.8% and 50%, respectively (7.7% and 30.8% in nonresponders, respectively). Patients aged ≤ 65 who had complete remission showed a longer 5-year survival (69.2%) than those aged > 65 years who experienced the same remission (30.8%), which is more than 51.7% in those aged ≤ 65 and 18% in those aged > 65 years present in the Swedish Acute Leukemia Registry. The same year, Khoury *et al.* also investigated a DC-pulsed mRNA vaccine encoding hTERT in 21 adult patients with AML: 16 in the first complete remission, three in the second complete remission,

1225 and two with early disease recurrence<sup>185</sup>. Among those in complete remission, 11 (58%)  
1226 developed a specific T-cell response<sup>48</sup> and were free of disease at a median follow-up of 52  
1227 months. Four (57%) patients older than 60 years were<sup>48</sup> free of disease recurrence at a median  
1228 follow-up of 54 months. To improve the effectiveness exerted by mRNA vaccines targeting  
1229 monoantigens, Lichtenegger *et al.* performed the first-in-human phase I trial involving 10 AML  
1230 patients on TLR7/8-matured DC-pulsed mRNA vaccines encoding WT1 and PRAME (two  
1231 AML-associated antigens) as well as CMV pp65<sup>186</sup>. Seven patients were subjected to the  
1232 complete regular 10 vaccinations, resulting in an increase in WT1 (2/10)-, PRAME (4/10)-, and  
1233 CMV pp65 (9/10)-specific<sup>128</sup> CD8<sup>+</sup> T cells, and CMV pp65-induced CD4<sup>+</sup> T cells (4/7) in the  
1234 peripheral blood. The median relapse-free survival was 1084 days, while the median overall  
1235 survival was not reached after 1057 days, with five patients (50%) relapse-free at the end of the  
1236 observation.

1237

1238 Some studies have focused on chronic lymphocytic leukemia and lymphoma. The studies were  
1239 mostly performed in preclinical trials. Kokhaei *et al.* showed that a DC-pulsed mRNA vaccine  
1240 did not elicit a marked enhancement in IFN- $\gamma$ -producing T cells compared with unpulsed DCs  
1241 against B-cell chronic lymphocytic leukemia<sup>187</sup>. In contrast, mRNA vaccines have exhibited  
1242 effectiveness in lymphoma. In 2011, Fotin-Mleczek *et al.* reported the use of a two-component<sup>36</sup>  
1243 mRNA vaccine (protamine-complexed) encoding TLR7 and tumour antigen<sup>168</sup> Gallus gallus OVA,  
1244 HsPSMA, or HsSTEAP for treating T-cell lymphoma<sup>165</sup> in an E. G7-OVA-based mouse model, in  
1245 which E. G7-OVA is a mouse T-cell lymphoma cell line stably expressing Gallus gallus OVA<sup>88</sup>  
1246<sup>188</sup>. The vaccine triggered<sup>1</sup> antigen-specific CD4<sup>+</sup> and CD8<sup>+</sup> T-cell responses, and sustained  
1247 immune memory, and the vaccination mediated a strong antitumour response in both  
1248 prophylactic and therapeutic contexts. In 2021, Tusup *et al.* conducted an assessment on the  
1249 efficacy of an mRNA vaccine in inducing immune response against TCR CDR3 regions using



a murine model based on EL4 T-lymphoma cell line, resulting in a feasible approach in protection against T-lymphoma<sup>189</sup>. In 2022, Slam *et al.* developed an mRNA vaccine consisting of an OVA-coded mRNA and a palmitic acid-modified TLR7/8 agonist R848 (C16-R848) together with a lipid-polyethylene glycol shell<sup>176</sup>. Vaccination significantly increased the amplification and infiltration of OVA-specific CD8<sup>+</sup> T cells in OVA-expressing syngeneic allograft mouse models of lymphoma and prevented tumour growth when the vaccine was given before tumour engraftment (84% reduction vs. control). At present, a phase I study is ongoing for the evaluation of the effects of mRNA-2752 (a lipid nanoparticle encapsulating mRNAs encoding human OX40L, IL-23, and IL-36γ) alone and combined with an immune checkpoint blockade after intratumoural injection in solid tumours and lymphoma (NCT03739931).

Overall, the mRNA vaccine showed promising effects in AML in clinical trials, although none has been approved for its standard therapy. Except for AML, mRNA vaccines in other human blood system cancers are principally in the preclinical phase, and more clinical trials are warranted to investigate their efficacy.

#### 4.7 mRNA vaccines against digestive system cancer

Cancer can arise in any tissue of the gastrointestinal tract, including the colon, stomach, esophagus, liver, and pancreas<sup>190</sup>. Digestive system cancer is a leading cause of cancer morbidity and death worldwide, and three million new cases and two million deaths from gastrointestinal cancers occur every year<sup>158</sup>. Gholamin *et al.* used a DC-pulsed tumour mRNA vaccine in esophageal squamous cell carcinoma *in vitro*, and the results showed a significant induction of cytotoxicity (median > 18.7% compared with the control) and INF-γ secretion (> twofold compared with the control)<sup>191</sup>. Mahdi Forghanifard *et al.* also used a DC-pulsed mRNA vaccine encoding MAGE-A4, NY-ESO1, and LAGE1, which also promoted the activation of

1275 CTLs against esophageal cells *in vitro* <sup>192</sup>. Peng *et al.* used a DC-pulsed mRNA vaccine derived  
1276 from HepG-2 cells or samples from hepatocellular carcinoma (HCC) patients, and the results  
1277 showed <sup>117</sup> an increase in the number of CD8<sup>+</sup> T cells in cytotoxic T lymphocytes (CTLs) and a  
1278 promotion of cytotoxic activity in HCC *in vitro* <sup>193</sup>. A preclinical study using mRNA 5671  
1279 evaluated its therapeutic efficacy in colorectal cancer. The vaccine described encodes the four  
1280 frequently observed KRAS mutations (G12C, G12D, G12V, and G13D) <sup>194</sup>. When used as  
1281 monotherapy or in combination with pembrolizumab, it promotes an augmentation in <sup>66</sup> CD8<sup>+</sup> T-  
1282 cell responses in mice. Similarly, Kim *et al.* showed that a DC-pulsed CEA mRNA vaccine with  
1283 modification of calreticulin and the TAT protein transduction domain <sup>28</sup> induced a potent CD4<sup>+</sup>  
1284 and CD8<sup>+</sup> T-cell response and antitumour effects in mice with colon cancer <sup>195</sup>. Clinically, Wan  
1285 *et al.* used a CD40-B-cell-pulsed mRNA vaccine encoding alpha-fetoprotein for the treatment  
1286 of HCC since their hypothesis was that the vaccine may boost a robust and prime naïve T-cell  
1287 response <sup>196</sup>; however, they did not report any preclinical or clinical results to date. Maeda  
1288 reported a phase I clinical trial on a DC-pulsed heat-shock protein 70-encoded mRNA vaccine  
1289 used at increasing doses in hepatitis C virus-related HCC <sup>197</sup>. Twelve patients were enrolled,  
1290 divided into three cohorts, and treated with three vaccinations every three weeks ( $1 \times 10^7$ ,  $2 \times$   
1291  $10^7$ , and  $3 \times 10^7$  DCs). The dose of  $3 \times 10^7$  DCs was the recommended dose according to the  
1292 outcome of the pretreatment. Two patients experienced complete response without recurrence,  
1293 five patients experienced disease progression, and five experienced stable disease. The two  
1294 patients with complete response showed no disease recurrence for 44 and 33 months,  
1295 respectively. Lesterhuis *et al.* conducted a comparison between the effects of DC-pulsed CEA  
1296 peptide and DC-pulsed CEA mRNA vaccines in patients diagnosed with resectable liver  
1297 metastases of colorectal cancer <sup>198</sup>. All patients received three intravenous and intradermal  
1298 vaccinations every week. However, anti-CEA-specific antibodies were detected in eight (8/11)  
1299 patients in the peptide group, but no antibodies were found in the five patients in the mRNA

group. In addition, an mRNA vaccine encoding neoantigens induced <sup>7</sup> specific T-cell immune responses in patients with gastrointestinal cancer <sup>199</sup>. The mRNA-based vaccine mRNA 4650 was clinically evaluated for the treatment of various digestive system cancers, including gastrointestinal cancer and liver cancer <sup>200,201</sup>. Patients with gastrointestinal cancer treated with an intramuscular administration of mRNA 4650 developed <sup>56</sup> CD4<sup>+</sup> and CD8<sup>+</sup> T-cell responses against tumour neoantigens. mRNA 4157 was designed to encode 34 unique neoantigens, and a phase I clinical study is ongoing in patients with MSI-high colorectal cancer and other solid tumours <sup>202</sup>. It induces antigen-specific T cells and is well tolerated when used as monotherapy or in combination with pembrolizumab, leading to complete or partial responses. Suso *et al.* <sup>153</sup> published a case report of a pancreatic cancer patient treated with a DC-pulsed telomerase-encoded mRNA vaccine <sup>203</sup>. <sup>97</sup> The patient was a 62-year-old woman who was treated with standard gemcitabine chemotherapy after developing multiple metastatic lymph node lesions after surgery. Chemotherapy was stopped because of the occurrence of severe neutropenia, and it was replaced with vaccination. The patient experienced a remarkable decrease in lymph node metastases after 32 months of vaccination without any increase in metabolic activity in the lesions compared with other lymph nodes. Furthermore, no serious treatment-related adverse events were observed during the 3-year vaccination. In 2013, Chen *et al.* compared the efficacy of DC-pulsed mRNA encoding mucin-4 and/or survivin in pancreatic cancer *in vitro* <sup>204</sup>. All three cohorts induced a CTL response, which was stronger for DCs cotransfected with both antigens. <sup>66</sup> A phase I clinical trial has been completed and evaluated the efficacy, safety, and tolerability in multiple cancers, including colorectal cancer, although the findings were not published (NCT03948763). In 2020, a phase I/II trial <sup>39</sup> assessed the safety and immunogenicity of an mRNA-based, personalized vaccine against neoantigens in autologous gastrointestinal cancer (NCT03480152). Specific immunogenic mutations as targets for the mRNA vaccine were identified in tumour-infiltrating lymphocytes. The vaccination elicited a <sup>13</sup> mutation-specific

1325 T-cell response against the predicted neopeptides, but no objective clinical responses were  
1326 found in the four treated patients in this trial. As mentioned in the paragraph on mRNA vaccines  
1327 against NSCLC, a clinical study of personalized mRNA vaccines that encode tumour-specific  
1328 antigens in patients with NSCLC and advanced esophageal cancer has been registered  
1329 (NCT03908671), and the results in esophageal cancer are still unknown.

1330

1331 Altogether, although clinical trials using mRNA vaccines to combat digestive system cancer are  
1332 limited, some effectiveness was shown in a fraction of patients, providing a foundation for  
1333 further development of efficient treatments for digestive system cancer.

1334

#### 1335 4.8 mRNA vaccines against breast cancer

1336 Breast cancer is the most frequently diagnosed cancer in women and the leading cause of  
1337 cancer-related death globally<sup>158</sup>. Global Cancer Statistics 2020 reports that female breast cancer  
1338 has surpassed lung cancer and has become the most frequently diagnosed cancer<sup>158</sup>. Breast  
1339 cancer includes three major subtypes: ER<sup>+</sup>, HER2<sup>+</sup>, and triple-negative breast cancer (TNBC)  
1340<sup>205</sup>. Conventional endocrine or targeted drugs are not effective against TNBC compared with  
1341 other subtypes, and TNBC has the worst prognosis, with over 50% of patients experiencing  
1342 relapse within the initial 3 to 5 years following diagnosis and a median overall survival of 10.2  
1343 months<sup>205,206</sup>. In 2013, five partners in academia and industry led by BioNTech AG launched  
1344 The Mutanome Engineered RNA Immuno-Therapy project (NCT02316457) to validate a  
1345 pioneering mRNA vaccine concept targeting individually expressed tumour antigens and  
1346 tumour neo-antigens in patients with TNBC from clinical and industrial perspectives<sup>207,208</sup>.  
1347 This project developed a computational medicine platform to identify tumour neoantigens and  
1348 TAAs in patients with TNBC, set up an mRNA vaccine warehouse for shared tumour antigens  
1349 solving > 95% of TNBC patients as well as a manufacturing process for producing a

1350 personalized mRNA vaccine. In addition, this platform evaluated the associated biomarkers  
1351 identifying molecular and immunological signatures correlated with clinical events following  
1352 vaccination and identified synergistic agents and optimized protocols of personalized vaccines.  
1353 The vaccine consists of “off-the-shelf” mRNA selected from a presynthesized mRNA and a  
1354 vaccine warehouse encoding neoantigens expressed in individual patient tumours as well as an  
1355 mRNA engineered on-demand encoding patient-specific sequence stretches that incorporate  
1356 nonsynonymous mutations. Every tumour is profiled before treatment to select the proper  
1357 shared tumour antigens and detect mutations by exome sequencing. A cutting-edge platform is  
1358 used for the design, manufacture, and release of tailored mRNA vaccines based on the output  
1359 of the profiling. In 2019, Schmidt reported phase I/II trials assessing the feasibility, safety, and  
1360 biological effectiveness of this personalized mRNA vaccine in Germany and Sweden <sup>208</sup>.  
1361 <sup>125</sup> Patients were allocated to one of two study arms at the end of the standard of care therapy.  
1362 Patients in arm 1 were subjected to eight vaccination cycles with a vaccine encoding shared  
1363 TAAs selected according to the tumour antigen expression profile (mRNA WAREHOUSE  
1364 vaccine). Patients in arm 2 were subjected to treatment with the mRNA WAREHOUSE vaccine  
1365 followed by eight vaccination cycles with a vaccine encoding personalized 20 unique  
1366 neoepitopes identified by next-generation sequencing (mRNA MUTATION vaccine).  
1367 Preliminary immune response results from patients in arm2 have been disclosed <sup>82</sup> at the Annual  
1368 <sup>49</sup> Meeting of the European Society of Medical Oncology <sup>208</sup>. Vaccine-triggered CD4<sup>+</sup> and/or  
1369 CD8<sup>+</sup> T-cell responses against 1-10 neoepitopes, as well as a great number of neoepitope-  
1370 specific T-cell responses (<sup>101</sup> 10.3% of peripheral CD8<sup>+</sup> T cells), were found in all 14 patients  
1371 vaccinated with the mRNA MUTATION vaccine. Moreover, approximately <sup>101</sup> 30% of peripheral  
1372 CD8<sup>+</sup> T cells exhibited a diversified CD8<sup>+</sup> T-cell response, characterized by a high number of  
1373 poly-epitopic TCR-clonotypes, which lasted for at least six months at high levels after the last  
1374 vaccination. Although vaccination induced specific T-cell responses, the survival data are still



unpublished, and the efficacy of the mRNA vaccine is not yet clear. Moreover, only one study investigated the efficacy of personalized anti-breast cancer mRNA vaccines, and more trials are needed to promote them in clinical practice.

## 5. mRNA vaccines in immunological diseases

Autoimmune diseases are characterized by chronic inflammation due to a dysregulated immune response to self-antigens <sup>209</sup>. Many clinical studies using mRNA vaccines against cancers or infectious diseases have exhibited their potential to trigger autoimmune diseases <sup>8</sup>. However, mouse models have revealed their ability to treat autoimmune diseases, although no clinical applications have yet been performed <sup>210</sup>. The physiological induction and maintenance of peripheral tolerance are primarily determined by the presentation of self-antigens by antigen-presenting cells (APCs) with diminished surface expression of costimulatory molecules, such as DC86. Conventional U-composed mRNA vaccines often elicit strong type I T helper cell responses driven by TLR signaling. Krienke *et al.* introduced a liposomal formulation that systemically delivers antigens encoded by the mRNA vaccine into lymphoid tissue-resident CD11c<sup>+</sup> APCs and replaced uridine (U) by the incorporation of N1-methylpseudouridine. This method avoids the significant activation of CD8<sup>+</sup> T cells, CD4<sup>+</sup> T cells, CD11<sup>+</sup> APCs, natural killer cells, and B cells, as well as the secretion of IFN- $\alpha$  or other inflammatory cytokines in mice, suggesting that nanoparticle-formulated N1-methylpseudouridin-modified mRNA is appropriate for the noninflammatory delivery of proteins into splenic CD11c<sup>+</sup> APCs. In an experimental autoimmune encephalomyelitis mouse model of multiple sclerosis induced by the selective expression of MOG (the epitope of myelin oligodendrocyte glycoprotein in DCs), mice were vaccinated with MOG-encoding N1-methylpseudouridine mRNA after immunization with MOG, and the results showed that they were protected from disease development. Vaccination also prevented further disease progression in mice with an

established disease and even reverted pathology in some cases. The treatment suppressed disease-promoting TH1, TH17, and TH1/TH17 cells by inducing FOXP3<sup>+</sup> regulatory T cells and increasing the expression of T-cell exhaustion markers (e.g., PD-1, CTLA4, TIGIT, TIM-3, and LGA-3). Vaccination did not influence the immune responses to unrelated antigens, and this approach was effective in models induced by different antigens (PLP, MBP, and MOBP), suggesting important aspects of this approach, such as the possibility of optimizing the mRNA vaccine to elicit protective immune responses against specific pathologies and maintaining antigen-specific immune tolerance to treat autoimmune diseases.

Allergy is a hypersensitivity reaction of the immune system to a foreign substance that is typically harmless to most individuals. This foreign substance, known as an allergen, triggers an immune response that results in various symptoms, such as itching, sneezing, watery eyes, and skin rash. Common allergens include pollen, dust mites, certain foods, medications, and insect venom. Allergies can range from mild to severe and, in some cases, can be life-threatening. mRNA vaccines also offer a safer approach to preventing allergic conditions by encoding the allergen and providing a purer immunizing antigen compared to traditional allergen extracts<sup>211</sup>. In mice, mRNA vaccines that encode allergens have been found to be effective in preventing type I allergies by activating a Th1 cell response<sup>212</sup>. After immunization, the mice were exposed to the corresponding allergen, and the resulting inflammatory signatures (e.g., eosinophils, IL-4 and IL-5) were reduced, while anti-inflammatory responses were enhanced (e.g., the induction of IFN- $\gamma$ -producing cells)<sup>213</sup>. More importantly, mRNA vaccines have been exhibited to generate long-term memory responses in mice, leading to potent anti-inflammatory responses upon re-exposure to allergens<sup>214</sup>. These findings illustrate the potential of mRNA vaccines for targeting allergies without the need for booster vaccinations.

## 6. mRNA vaccines in tissue damage

Tissue damage refers to any physical injury or harm that occurs to the body's tissues. This can be resulted from a variety of factors, such as trauma, infection, inflammation, and exposure to harmful substances or radiation. Tissue damage can affect any part of the body, including the skin, muscles, bones, organs, and nerves. Cardiovascular damage is the leading threat to human health worldwide <sup>175</sup>. They include but are not limited to <sup>7</sup> coronary heart disease, hypertension, heart failure, vascular calcification, and cardiac fibrosis <sup>141</sup>. Cardiovascular damage is mostly irreversible and can only be controlled. In 2016, AstraZeneca developed AZD8601, an mRNA vaccine encoding VEGF-A165 with a minimal innate immune response <sup>215-217</sup>. AZD8601 used in preclinical models induced more blood vessels in local tissue and significantly accelerated the healing of chronic wounds in a dose-dependent manner <sup>215-217</sup>. A clinical trial was subsequently started in 2017 <sup>35</sup> in patients with coronary artery disease undergoing coronary artery bypass grafting surgery (NCT03370887). Patients were randomly and equally divided into three groups and further treated with AZD8601 at different doses or placebo, with the evaluation of the safety of AZD8601 as the primary endpoint. <sup>111</sup> The results were reported at the American Heart Association's Scientific Sessions 2021, showing the safety and tolerability of AZD8601 as well as the positive trends in exploratory efficacy objectives. Rurik *et al.* developed an antifibrotic treatment strategy based on chimeric antigen receptor T cells using CD5-targeted LNPs-mRNA. Ten micrograms of CD5/LNP-mRNA encoding FAPCAR was intravenously injected into mice with cardiac injury induced by the delivery of AngII/PE. Echocardiography showed remarkable functional improvement in the injured mice two weeks after the initial treatment. Of note, left ventricular diastolic function was significantly improved and returned to the original healthy level during the follow-up period. The improvement in the extracellular matrix burden was more evident in the mice treated with LNP-mRNA than in those treated with saline. Altogether, these findings were encouraging and provide possibilities for the treatment of irreversible

1450 cardiovascular diseases.

1451

1452 Apart from cardiovascular diseases, mRNA vaccines have shown effectiveness in multiple soft  
1453 tissue damages<sup>218</sup>. The administration of mRNA-LNPs containing nucleoside-modified mRNA  
1454 that encodes HGF and EGF was found to stimulate liver regeneration in mice with chronic  
1455 choline-deficient ethionine-mediated liver injury and acute acetaminophen-induced liver  
1456 toxicity<sup>219</sup>. In the same year, another study utilized mRNA that encodes VEGF-C to induce the  
1457 growth of lymphatic vessels in mice<sup>220</sup>. By administering low dose of VEGF-C mRNA-loaded  
1458 lipid nanoparticles (mRNA-LNPs), targeted lymphatic growth was induced, leading to the  
1459 remarkable reversal of lymphedema and restoration of lymphatic function in an experimental  
1460 mouse model. In a mouse model of diabetes, the delivery of nucleoside-modified mRNA  
1461 encoding FGF-2 through mineral-coated microparticles improved the healing of dermal wounds  
1462 by hastening the process of complete wound closure<sup>221</sup>.

1463

1464 In 2015, Elangovan *et al.* showcased the promising potential of mRNA-based therapeutic  
1465 strategies in the field of bone regeneration<sup>222</sup>. They employed pseudouridine and 5-  
1466 methylcytidine-modified mRNA encoding BMP-2, which was combined with  
1467 polyethylenimine (PEI) and incorporated into collagen scaffolds prior to the implantation into  
1468 rat calvarial defects. After a duration of four weeks, the PEI-BMP-2 mRNA-activated matrices  
1469 exhibited a significant improvement in bone regeneration when compared with the PEI-  
1470 complexed BMP-2 pDNA-activated matrices. Microcomputed tomography analysis revealed a  
1471 significant increase in both the amount of bone volume and total volume of regenerated bone  
1472 in defects treated with scaffolds embedded with PEI-mRNA and PEI-pDNA complexes.  
1473 Specifically, the defects treated with PEI-mRNA exhibited a 3.9-fold higher bone volume, while  
1474 the total volume of regenerated bone was 1.9-fold higher compared to the negative control

group. Balmayor *et al.* also confirmed the osteogenic potential of nucleoside-modified BMP-2 mRNA treatment in a rat femur bone defect model<sup>223</sup>. Furthermore, the administration of a low dose (2.5 µg/defect) of nucleoside-modified mRNA within a fibrin gel matrix demonstrated speeded up bone healing compared to the fibrin control group, as evidenced by significant improvements observed just 2 weeks after application. A study was undertaken with the goal of augmenting long-lasting mRNA delivery to specific cells and creating a convenient ready-to-use product. To achieve this, the researchers developed a vacuum-dried construct known as transcript-activated matrices (TAMs). In a noncritical femoral bone defect rat model, collagen sponges were preloaded with nucleoside-modified BMP-2 mRNA-loaded lipid nanoparticles (mRNA-LNPs), resulting in a remarkable enhancement of bone generation when compared to empty collagen sponges. exhibited exceptional stability at room temperature for a minimum of 6 months, and facilitated prolonged protein generation for up to 6 days. This seminal study showed BMP-2-encoding TAMs were effective in delivering sustained mRNA to target cells. In a subsequent investigation, the researchers explored the dose-dependent impact of nucleoside-modified BMP-2-encoding TAMs on the promotion of new bone formation in a critical femoral defect rat model. Micro-CT and histological analyses revealed that the higher dose of the product (15 µg/defect) exhibited approximately double the amount of newly formed bone compared to the lower dose (3.75 µg/defect)<sup>224</sup>. A study conducted a comparison of BMP-9-PEI-activated matrix (collagen scaffold) and BMP-2-PEI-activated matrix in terms of their ability to promote bone regeneration. The results unveiled a superior capacity of BMP-9 mRNA transfection in enhancing the in vitro osteogenic differentiation of human bone marrow mesenchymal stem cells compared to the administration of BMP-2 mRNA. Furthermore, when implanted in rat calvarial bone defects, BMP-9 mRNA exhibited a remarkable 2-fold increase in the connectivity density of the regenerated bone compared to BMP-2 mRNA<sup>225</sup>. To enhance the gene-activated collagen membrane, an additional improvement was made by immersing the



perforated collagen membrane in a solution containing BMP-9 mRNA-PEI complexes,  
followed by a freeze-drying process. Upon application of this product to rat calvarial defects, a  
notable and significant formation of new bone was observed after a 4-week period of treatment  
<sup>226</sup>. A combination therapy involving mRNA, stem cell transplantation, and scaffolds has  
recently been investigated for bone regeneration. In a rat model of calvarial bone defects, the  
implantation of nucleoside-modified BMP-2 and VEGF-A mRNA-transfected bone marrow  
mesenchymal stem cells within a collagen scaffold resulted in a significant augmentation of  
bone regeneration. The simultaneous delivery of BMP-2 and VEGF-A mRNAs exhibited a  
synergistic effect, effectively promoting both osteogenic and angiogenic processes <sup>227</sup>. This  
synergistic action resulted in superior healing outcomes when compared to treatments involving  
BMP-2 or VEGF-A alone. The findings strongly indicate that employing a combination of  
multiple growth factor-encoding mRNAs, along with cell therapy and a biomaterial scaffold,  
holds great promise as a viable strategy to attain favorable outcomes for bone regeneration.

Together, mRNA vaccines show promising potential in the promotion of tissue generation.  
Apart from the abovementioned damage, mRNA vaccines may be able to promote the  
generation of other tissues.

## 7. mRNA vaccines in rare diseases

Rare diseases are defined as medical conditions that impact a small proportion of the population,  
characterized by their low prevalence and often limited understanding due to their rarity.  
Patients may struggle to find appropriate medical care and treatment. mRNA vaccines have  
been reported to have the potential to treat multiple rare diseases. Cystic fibrosis is a hereditary  
condition, predominantly impacting the lungs, pancreas, and other organs <sup>228,229</sup>. It is caused by  
a mutation in the *CFTR* gene, causing the generation of thick, sticky mucus in the lungs and

other organs. This mucus can clog airways and make it difficult to breathe, leading to chronic lung infections, lung damage, and respiratory failure. Cystic fibrosis can also affect the pancreas, causing digestive problems and malnutrition, and it can lead to other complications, such as liver disease, diabetes, and infertility. Cystic fibrosis is a lifelong condition that currently has no cure, while treatment helps symptom management as well as improve quality of life. In 2018, Robinson *et al.* reported that a clinically relevant lipid nanoparticle-packed chemically modified mRNA encoding CFTR increased membrane-localized CFTR and rescued its role as a chloride channel in patient-derived bronchial epithelial cells; its nasal application restored CFTR-mediated chloride secretion to conductive airway epithelia in CFTR-deficient mice, representing a promising platform for the correction of cystic fibrosis<sup>230</sup>. Preclinical evaluation of MRT5005 (an mRNA encoding the CFTR protein) administered by nebulization validated cystic fibrosis correction in mice and nonhuman primates<sup>231</sup>. A phase I/II clinical study is currently in progress, seeking participants for a randomized, double-blinded, placebo-controlled study. The trial aims to assess the safety, tolerability, and biological activity of MRT5005 when administered via nebulization to adults diagnosed with cystic fibrosis (NCT03375047).

Inherited metabolic disorders are significant contributors to illness and death in children<sup>232</sup>. These disorders, which affect approximately 1 in 800 live births, often stem from mutations in a single gene inherited in an autosomal recessive pattern<sup>233</sup>. Inherited metabolic diseases are responsible for 10-15% of pediatric acute liver failure cases, with mortality rates ranging from 22-65%<sup>233</sup>. mRNA vaccines have been tested in several rare genetic disorders, such as hereditary tyrosinemia type 1, phenylketonuria (PKU), methylmalonic acidemia (MMA), propionic acidemia (PA), glycogen storage disease type 1a (GSD1a), and ornithine transcarbamylase (OTC) deficiency. PKU is a genetic metabolic disorder resulting from

insufficient functional phenylalanine hydroxylase (PAH) activity, causing the buildup of phenylalanine (Phe) in the blood and organs of those affected<sup>234,235</sup>. Without treatment, patients experience significant neurological damage. Administering mouse Pah mRNA packaged in LNPs through repeated intravenous injection into a PKU (Pah<sup>enu2</sup>) mouse model produced therapeutic PAH protein, reduced Phe levels in the liver, serum, and brain, and reversed the progression of the disease<sup>236,237</sup>. These findings suggest Pah mRNA formulated in LNPs offers an alternative therapeutic option for PKU patients who eliminates the need for a lifelong Phe-restricted diet. In line with this possibility, ModernaTx, Inc. (Cambridge, MA, USA) has included PAH PKU mRNA-3283 in its product development pipeline ([www.modernatx.com/research/product-pipeline](http://www.modernatx.com/research/product-pipeline)). MMA is an organic acidaemia that poses a high risk of morbidity as well as death and currently has no approved treatments addressing its underlying cause<sup>238</sup>. This autosomal recessive disorder hinders the metabolism of propionate derived from certain proteins and fats<sup>239</sup>. As a result, there is a notable accumulation of methylmalonic acid in body fluids and tissues. The primary cause of this disease is commonly attributed to a deficiency in the mitochondrial enzyme known as methylmalonyl-coenzyme A (CoA) mutase (MUT). Repeated intravenous injection of LNP-encapsulated MUT mRNA into hypomorphic Mut<sup>-/-</sup>, Tg<sup>INS-CBA-G715V</sup> mice resulted in a decrease in plasma MMA concentrations as well as an enhanced survival rate<sup>240,241</sup>. Significantly, comprehensive safety studies revealed no discernible alterations in liver function tests, inflammatory cytokine generation, or the production of anti-MMA antibodies. A phase I/II clinical trial is presently underway to assess the safety, pharmacokinetics, and pharmacodynamics of administering LNP-encapsulated human MUT mRNA (mRNA-3705) to individuals diagnosed with isolated methylmalonic acidemia (NCT04899310 and NCT05295433). PA is a pediatric disorder caused by a mitochondrial deficiency in propionyl-CoA carboxylase (PCC), which is an enzyme consisting of a heterododecamer encoded by the *PCCA* and *PCCB* genes that plays a vital role in

1575 <sup>130</sup> catalyzing the carboxylation of propionyl-CoA to methylmalonyl-CoA within the body <sup>242</sup>. This  
1576 deficiency hampers the metabolism of propionate, <sup>139</sup> resulting in the accumulation of toxic  
1577 metabolites within the body, such as <sup>1</sup> 2-methylcitrate, 3-hydroxypropionate, and propionyl  
1578 carnitine. Intravenous injection of <sup>1</sup> LNP-encapsulated PCCA and PCCB mRNAs led to the  
1579 generation <sup>1</sup> of therapeutic levels of PCCA and PCCB in the livers of a hypomorphic disease  
1580 model (*Pcca*<sup>-/-</sup> [p. A138T]) in mice <sup>243</sup>. During a 6-month duration, the repeated administration  
1581 <sup>1</sup> of PCCA and PCCB mRNAs encapsulated in LNPs was well tolerated. This treatment approach  
1582 resulted in a <sup>106</sup> reduction of toxic metabolite levels in the plasma, although complete normalization  
1583 was not achieved. Liver transaminase levels remained within the normal range, and no adverse  
1584 reactions were observed. These findings support the ongoing Phase I/II study of mRNA-3927  
1585 <sup>1</sup> (LNP-encapsulated PCCA and PCCB mRNAs) to evaluate the safety and pharmacodynamic  
1586 activity of the therapy in PA patients aged 1 year or older (NCT05130437 and NCT04159103).  
1587 <sup>1</sup> GSD1a is a genetic metabolic disorder resulting from an autosomal recessive mutation in the  
1588 gene responsible for coding the catalytic subunit of glucose-6-phosphatase (G6Pase) <sup>244</sup>. This  
1589 enzyme hydrolyses <sup>1</sup> glucose-6-phosphate, producing free glucose. As the main hub for  
1590 gluconeogenesis, the liver serves as the primary organ affected by disruptions in this process.  
1591 GSD1a is characterized by symptoms such as hypoglycemia, hypertriglyceridaemia, <sup>1</sup> anemia,  
1592 renal disease, and an increased lifelong risk of HCC. A recent study demonstrated that repeated  
1593 intravenous injection of LNP-encapsulated hG6PC-a mRNA in <sup>1</sup> a liver-specific G6pc knockout  
1594 mouse (*L. G6pc*<sup>-/-</sup>) resulted in a significant enhancement <sup>1</sup> in fasting glycemia and a decrease in  
1595 GSD1a biomarkers, such as glycogen, G6P, and triglycerides <sup>245</sup>. oth treated and control animals  
1596 exhibited similar levels of cytokines, including IFN- $\gamma$ , <sup>1</sup> IL-1 $\beta$ , TNF $\alpha$ , and IL-6, in their serum.  
1597 <sup>1</sup> The treatment did not induce anti-G6Pase responses, liver injury, alterations in body weight, or  
1598 any signs of distress. These results support further investigation of LNP-encapsulated mRNA  
1599 <sup>75</sup> as a potential treatment for inherited metabolic disorders. Currently, a clinical <sup>24</sup> study is underway

to assess the safety, tolerability, pharmacokinetics, and pharmacodynamics of a single intravenous dose of LNP-encapsulated hG6PC-a mRNA (mRNA-3745) in patients with GSD1a (NCT05095727). OTC is a crucial enzyme in the urea cycle that is found in the liver and facilitates the conversion of carbamoyl phosphate and ornithine into citrulline and phosphate<sup>246</sup>. This process plays vital roles in the elimination of ammonia from the body. High levels of ammonia can cause varying degrees of neuropsychiatric symptoms. Despite various available treatments, such as protein-restricted diets and ammonia scavengers, it is important to note that there is currently no definitive treatment for addressing the root cause of OTC deficiency. Prieve *et al.* demonstrated that NP-encapsulated hOTC mRNA (ARCT-810) successfully treated a hyperammonemic murine model of OTC deficiency (Otcspf-ash), resulting in the normalization of plasma ammonia and orotic acid levels, an enhanced survival, as well as a good safety profile<sup>106</sup>. A phase I study has been completed assessing the safety, tolerability and pharmacokinetics of ARCT-810 in healthy adult subjects, but the result has not been reported (NCT04416126).<sup>46</sup> Two phase IB clinical trials (NCT05526066 and NCT04442347) are currently underway to assess the safety, tolerability, and pharmacokinetics of a single dose of ARCT-810 in clinically stable OTC-deficient patients.

Together, there is a lack of therapeutic agents that can cure these rare diseases. mRNA vaccines render it possible to control these diseases long-term, despite still in an attempt stage. More studies are warranted to validate their efficacy against rare diseases.

## 8. Conclusions and perspectives

mRNA vaccines have become a hotspot in disease prevention and treatment, becoming predominant in preclinical and clinical trials, especially in infectious diseases and cancers<sup>143</sup>. Nevertheless, except for the anti-COVID-19 mRNA vaccine, few have been approved for



1625 disease treatment thus far. Several challenges are not completely addressed that may limit the  
1626 application of mRNA vaccines. Striking a balance between achieving optimal antigen  
1627 production and ensuring adequate adjuvant effects poses a significant challenge. The adjuvant  
1628 effect of mRNA vaccines promotes innate and adaptive immunity, but excessive innate  
1629 immunity inhibits mRNA translation<sup>248,249</sup>. 5' capping, nucleoside modification, poly(A) tail  
1630 modification, and HPLC purification are strategies already used to decrease innate immunity  
1631<sup>17,250,251</sup>. The interaction of the delivery carrier mRNA and innate immune system requires  
1632 further investigation to achieve an effective balance. Another challenge is the large-scale  
1633 manufacturing of mRNA. As a consequence of the lack of a continuous manufacturing process,  
1634 synthesis, purification, and formulation must be performed in different facilities in three states  
1635 in the USA, largely limiting the rapid manufacture of mRNA vaccines. For instance, the  
1636 manufacture of millions of doses of BNT162b2 takes 60 days, far from satisfying the  
1637 vaccination needs of 6 billion people worldwide (derived from  
1638 <https://www.nytimes.com/interactive/2021/health/pfizer-coronavirus-vaccine.html>).  
1639 continuous manufacturing process may enhance the efficiency of mRNA vaccine production by  
1640 combining three facilities into a fluidic system. Continuous manufacturing may ensure the  
1641 recycling and reuse of raw compounds (e.g., enzymes or NTPs), and avoiding transport may  
1642 significantly reduce time and costs. Proper temperature control is crucial for maintaining the  
1643 efficacy of vaccines. Most vaccines can be stored at 2-8°C for extended periods, and mRNA  
1644 vaccines such as BNT162b2 and mRNA-1273 must be kept at -80°C and -20°C, respectively.  
1645 This poses a significant challenge for their distribution. The instability of the LNP-mRNA  
1646 system is the reason for the strict temperature requirement for storing mRNA vaccines. Despite  
1647 various lyoprotectants (e.g., lactate, mannose, and trehalose) have been incorporated into  
1648 mRNA-protamine formulations, enabling successful long-term storage at room temperature  
1649 after freeze-drying, as claimed in several patents, it is important to note that the efficacy of

1650 preserving mRNA delivery efficiency *in vivo* has been limited when 20% (weight by volume)  
1651 sucrose or trehalose is added to LNPs and subjected to freeze-drying. The alteration of the  
1652 nanostructure of the LNP-mRNA system due to freeze-drying and reconstitution is believed to  
1653 potentially impact the LNPs' interactions with plasma, which can lead to a decline in mRNA  
1654 delivery efficiency *in vivo*. To date, there is no known resolution to the requirement for  
1655 extremely cold storage and transportation conditions for LNP-mRNA vaccines, which could  
1656 impose significant constraints on the widespread use of mRNA vaccines in the future. Safety is  
1657 another concern in the use of mRNA vaccines. The extensive deployment of the COVID-19  
1658 mRNA vaccine created a chance to thoroughly study the adverse reactions associated with  
1659 mRNA vaccines. According to safety monitoring by the Centers for Disease Control and  
1660 Prevention (CDC, [https://www.cdc.gov/coronavirus/2019-ncov/vaccines/safety/adverse-](https://www.cdc.gov/coronavirus/2019-ncov/vaccines/safety/adverse-events.html)  
1661 [events.html](https://www.cdc.gov/coronavirus/2019-ncov/vaccines/safety/adverse-events.html)), some people have reported no side effects after administration of the COVID-19  
1662 mRNA vaccine, while many have experienced mild to moderate side effects such as headache,  
1663 fatigue, and soreness at the injection site, which are generally temporary and typically resolve  
1664 within a few days. Although several reactions are rare after vaccination, multiple cases have  
1665 been reported. Anaphylaxis, a severe type of allergic reaction, has occurred in about 5 cases per  
1666 million vaccine doses administered. Thrombosis with thrombocytopenia syndrome is a rare yet  
1667 significant adverse event characterized by the formation of blood clots in major blood vessels  
1668 and a decrease in platelet count. It has been reported in around 4 cases per million doses  
1669 administered, signifying its infrequent occurrence but considerable severity. More importantly,  
1670 the cases of myocarditis and pericarditis are increasing after the administration of mRNA  
1671 vaccines. During the study period, more than 350 million mRNA vaccines were administered,  
1672 and the CDC scientists observed that the incidence of myocarditis was highest among males in  
1673 the following age groups following the second dose of an mRNA vaccine: 12-15 years (70.7  
1674 cases per million doses of Pfizer-BioNTech), 16-17 years (105.9 cases per million doses of

1675 Pfizer-BioNTech), and 18-24 years (52.4 cases and 56.3 cases per million doses of Pfizer-  
1676 BioNTech and Moderna, respectively). As of March 2, 2023, 715 reports have been verified to  
1677 meet the CDC's working case definition for myocarditis, and the findings are as follows: 5-11  
1678 years (23 verified reports of myocarditis after 23,376,785 doses administered), 12-15 years (376  
1679 verified reports of myocarditis after 25,913,772 doses administered), and 16-17 years (316  
1680 verified reports of myocarditis after 14,180,263 doses administered). The mechanisms causing  
1681 these rare adverse events remain to be addressed. Finally, the durability of mRNA vaccines  
1682 against COVID-19, such as the Pfizer-BioNTech and Moderna vaccines, may decline over time.  
1683 The virus is constantly evolving, and new variants may emerge that are not as well recognized  
1684 by the immune system as the original virus, leading to decreased effectiveness of the vaccine  
1685 over time, especially if the variants become more prevalent. In addition, the immune response  
1686 generated by the vaccine may decrease over time as the immune system's memory of the virus  
1687 fades. This is a normal process that occurs with any vaccine, but the rate of decline may be  
1688 faster with mRNA vaccines due to their unique mechanism of action. Furthermore, the vaccine  
1689 may not provide as strong or long-lasting protection against certain populations, such as  
1690 immunocompromised individuals or elderly individuals. Several approaches may improve the  
1691 overall effectiveness of the vaccine and extend its duration, including administering booster  
1692 shots of the mRNA vaccine at specific intervals, using different types of vaccines (such as a  
1693 combination of mRNA and traditional vaccines), and optimizing the storage and transportation  
1694 conditions for mRNA vaccines. Altogether, the technique for mRNA vaccine preparation and  
1695 application is not perfect and remains to be further ameliorated.

1696

1697 In addition to these universal issues underlying mRNA vaccines, there are specific challenges  
1698 in different diseases. Given the application of mRNA vaccines in immunological diseases, rare  
1699 diseases and tissue damage are still at an early stage, and there are insufficient studies assessing

1700 their efficacies and challenges in the context of these diseases. Therefore, infectious diseases  
1701 and cancer, in which mRNA vaccines are more prevalently used, are selected as examples for  
1702 discussing the obstacles of mRNA vaccines in specific diseases. There are two main categories  
1703 of infectious viruses: those that are newly emerging or reemerging and those that cause chronic  
1704 infections. The protection efficacy of mRNA vaccines against the rapidly emerged coronavirus  
1705 has been exceptional, and their low production cost and ease of manufacture suggest that they  
1706 could be instrumental in control of future pandemics resulted from rapidly emerging viruses.  
1707 However, these emerging or reemerging viruses tend to mutate rapidly, presenting a challenge  
1708 in developing mRNA vaccines that are broad or seasonal in nature. Additionally, generating  
1709 effective neutralizing antibodies against chronic infectious viruses is typically difficult, as they  
1710 are adept at evading innate immunity. Unlike infectious diseases, cancer is caused by genetic  
1711 and epigenetic factors, and it is characterized by complex and heterogeneous antigen expression,  
1712 thus requiring the use of a personalized mRNA vaccine. However, several challenges limit the  
1713 clinical application of personalized cancer mRNA vaccines, such as the still technological  
1714 obstacles limiting the precise detection and quantification of immunogenic tumour neoantigens  
1715 and an insufficient understanding of the accurate biological mechanism of tumour immune  
1716 evasion. Conventional exome sequencing does not capture noncanonical peptides derived from  
1717 the genomic “dark matter” that may include most of the new epitopes expressed by tumours  
1718 <sup>252,253</sup>. Experimental and *in silico* approaches for identifying neoantigens are largely biased  
1719 toward MHC I epitopes and insensitive to MHC II and rare allotypes, causing a significant  
1720 underestimation of the frequency of targetable immunogenic neoantigens. Moreover, a  
1721 therapeutic vaccine usually works better in the context of adjuvant therapy or in cases of  
1722 minimal residual disease, where the tumour burden is low and the immunosuppressive  
1723 microenvironment is not firmly established <sup>254</sup>. Instead, the T-cell response triggered by  
1724 personalized vaccination would be largely slowed down by various immunosuppressive cells

1725 <sup>255-257</sup> (e.g., cancer-associated fibroblasts, vascular endothelial cells, <sup>134</sup> tumour-associated  
1726 macrophages, tumour-associated neutrophils, suppressive myeloid cells, regulatory T cells, and  
1727 regulatory B cells) and immunosuppressive regulators (<sup>133</sup> e.g., PD-1, PD-L1, CTLA-4, IDO-1,  
1728 TGF- $\beta$ , IL-10, and IL-35) in the tumour immune microenvironment (TIME) of large load  
1729 tumours. In this context, a combined therapy is required for effective control of tumours.  
1730 Vaccination enables the turn from the immunological “cold” tumour into the “hot” phenotype  
1731 and induces PD-L1 upregulation in the TIME <sup>254</sup>. This phenomenon guides the combination of  
1732 <sup>40</sup> PD-1/PD-L1 blockade and personalized vaccination. The clinical trial NCT03897881  
1733 evaluating pembrolizumab in combination with neoantigen vaccination against melanoma is  
1734 active but not recruiting patients; for example, the study is ongoing, and the participants are  
1735 under therapy or being evaluated but not enrolled. Similarly, cancer vaccines preclinically  
1736 synergize with the inhibition of other inhibitory molecules (e.g., CTLA-4, TIM-3, LAG-3, <sup>104</sup> IDO,  
1737 or TGF- $\beta$ ) and the stimulation of costimulatory molecules (e.g., GITR, OX40, and CD137) <sup>254</sup>.  
1738 Additionally, a phase I clinical trial for glioblastoma (NCT02709616) tested a personalized  
1739 vaccination together with temozolomide and radiotherapy. Recently, Huang *et al.* established a  
1740 pipeline to construct tumour immune subtypes, which act as biomarkers that reflect the immune  
1741 status in tumours and their TIME (e.g., immune infiltration and function, as well as <sup>2</sup> the  
1742 expression of immune checkpoints and immunological cell death modulators) <sup>258,259</sup>. The  
1743 immune subtype might provide precise guidance for combined cooperation with the mRNA  
1744 vaccine, warranting further clinical investigation.



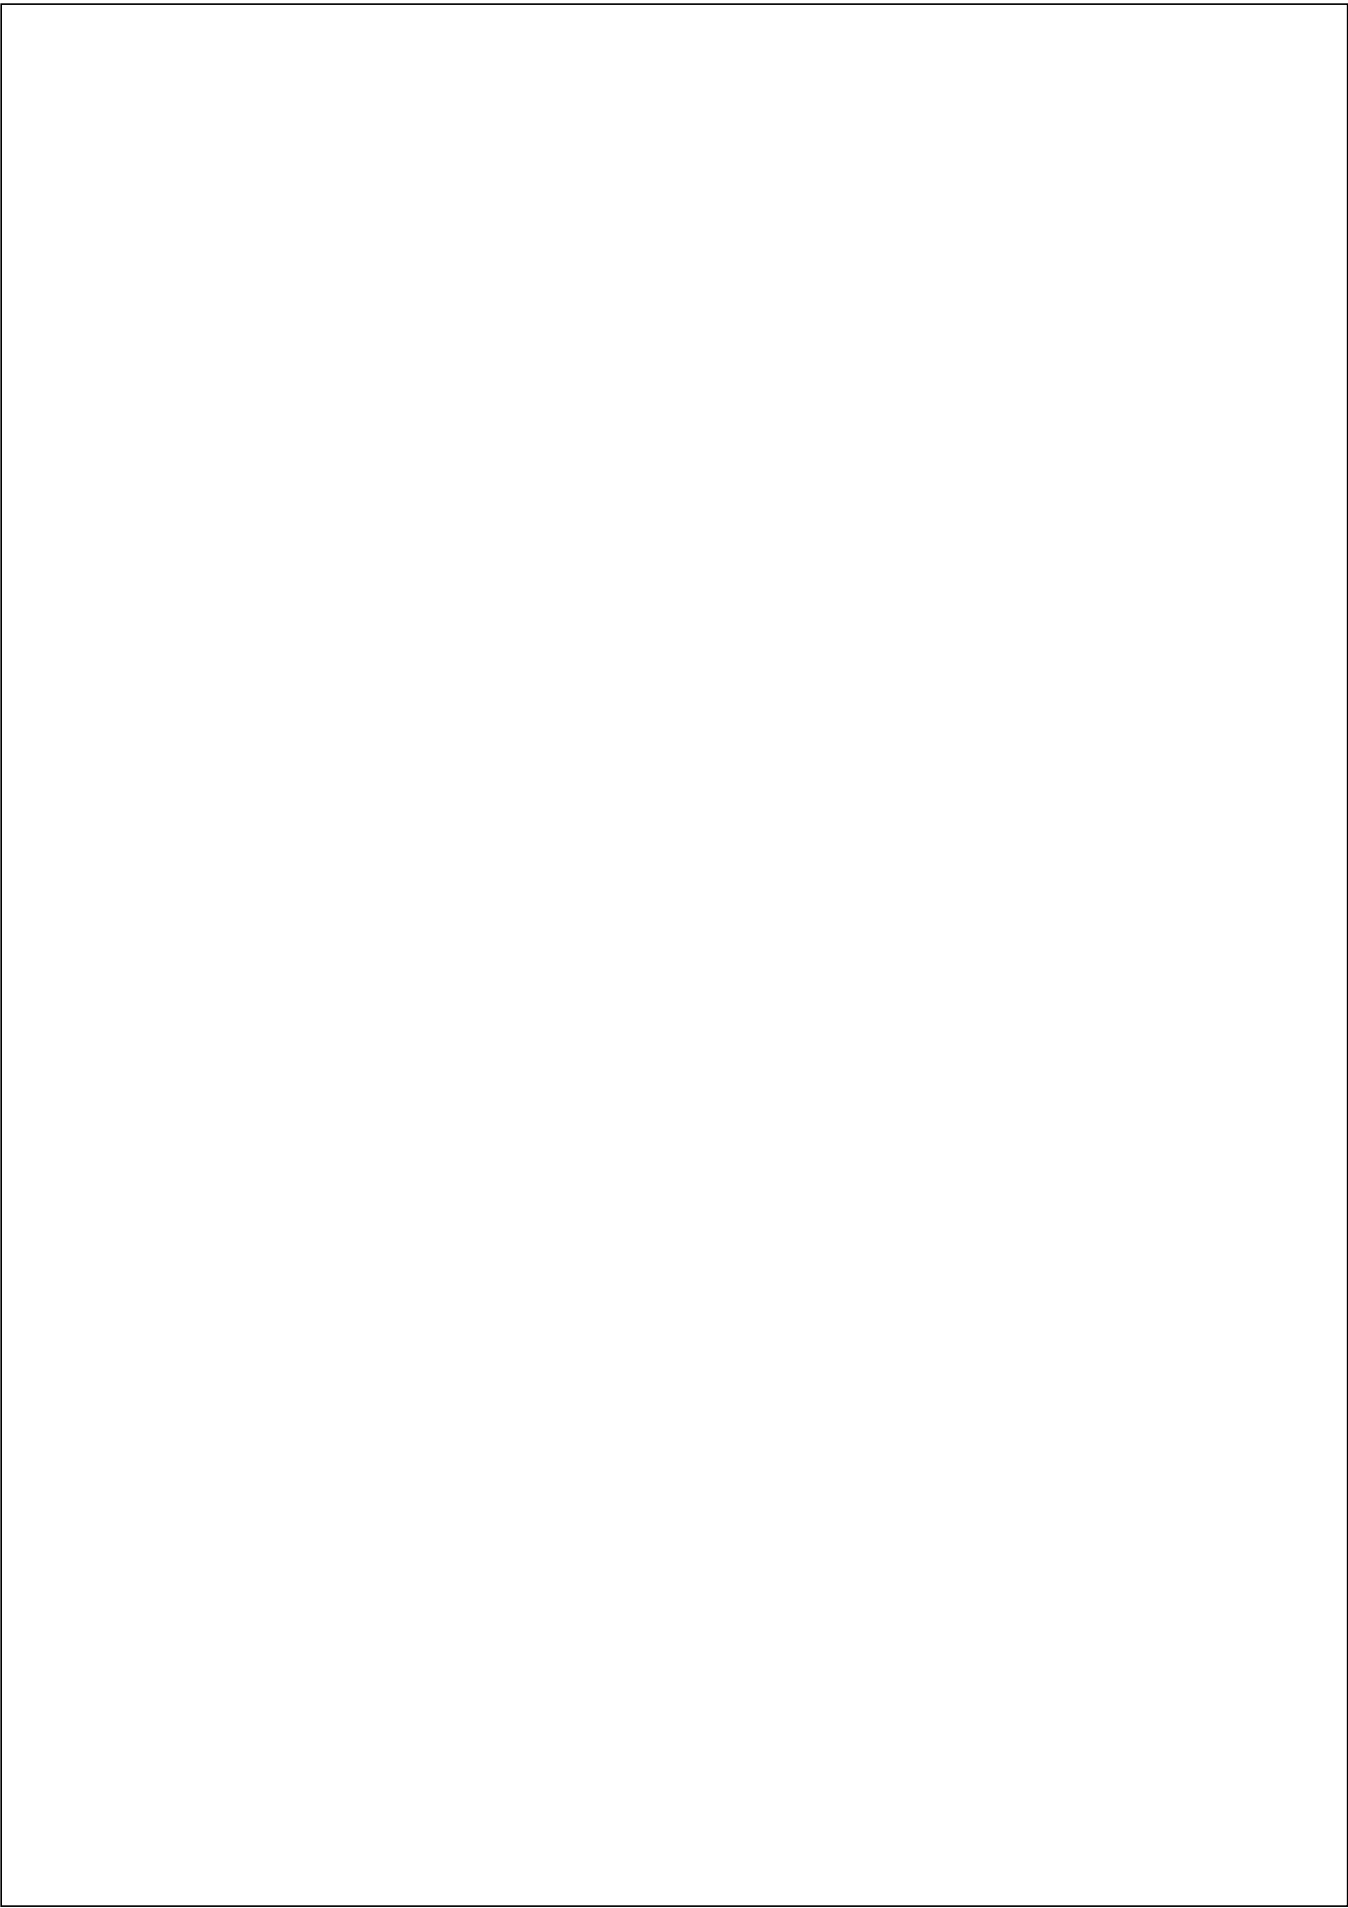

# 22%

SIMILARITY INDEX

### PRIMARY SOURCES

|   |                                                                                                                                                                                                                                                                  |                |
|---|------------------------------------------------------------------------------------------------------------------------------------------------------------------------------------------------------------------------------------------------------------------|----------------|
| 1 | <a href="http://www.ncbi.nlm.nih.gov">www.ncbi.nlm.nih.gov</a><br>Internet                                                                                                                                                                                       | 547 words — 2% |
| 2 | <a href="http://www.researchgate.net">www.researchgate.net</a><br>Internet                                                                                                                                                                                       | 308 words — 1% |
| 3 | W. Wisitrasameewong, C. Champaiboon, T. Surisaeng, N. Sa-Ard-Iam, M. Freire, N. Pardi, S. Pichyangkul, R. Mahanonda. "The Impact of mRNA Technology in Regenerative Therapy: Lessons for Oral Tissue Regeneration", Journal of Dental Research, 2022<br>Crossref | 294 words — 1% |
| 4 | <a href="http://anrs.fr">anrs.fr</a><br>Internet                                                                                                                                                                                                                 | 234 words — 1% |
| 5 | <a href="http://www.anrs.fr">www.anrs.fr</a><br>Internet                                                                                                                                                                                                         | 155 words — 1% |
| 6 | <a href="http://adam.curry.com">adam.curry.com</a><br>Internet                                                                                                                                                                                                   | 151 words — 1% |
| 7 | <a href="http://www.nature.com">www.nature.com</a><br>Internet                                                                                                                                                                                                   | 138 words — 1% |
| 8 | Jinjin Chen, Jianzhu Chen, Qiaobing Xu. "Current Developments and Challenges of mRNA Vaccines", Annual Review of Biomedical Engineering, 2022                                                                                                                    | 130 words — 1% |

- 
- 9 [www.mdpi.com](http://www.mdpi.com) 128 words — 1 %  
Internet
- 
- 10 [rcastoragev2.blob.core.windows.net](http://rcastoragev2.blob.core.windows.net) 104 words — < 1 %  
Internet
- 
- 11 "Messenger RNA Therapeutics", Springer Science and Business Media LLC, 2022 90 words — < 1 %  
Crossref
- 
- 12 [www.cdc.gov](http://www.cdc.gov) 77 words — < 1 %  
Internet
- 
- 13 Mia Karam, Georges Daoud. "mRNA Vaccines: Past, Present, Future", Asian Journal of Pharmaceutical Sciences, 2022 68 words — < 1 %  
Crossref
- 
- 14 [www.tandfonline.com](http://www.tandfonline.com) 68 words — < 1 %  
Internet
- 
- 15 [www.pubfacts.com](http://www.pubfacts.com) 62 words — < 1 %  
Internet
- 
- 16 [covid-19pharmacovigilance.paho.org](http://covid-19pharmacovigilance.paho.org) 61 words — < 1 %  
Internet
- 
- 17 [www.ihs.gov](http://www.ihs.gov) 59 words — < 1 %  
Internet
- 
- 18 Xirui Qiu, Siyan Xu, Yang Lu, Zichen Luo, Yangtian Yan, Chuyue Wang, Jianjian Ji. "Development of mRNA vaccines against respiratory syncytial virus (RSV)", Cytokine & Growth Factor Reviews, 2022 51 words — < 1 %  
Crossref

19 Shugang Qin, Xiaoshan Tang, Yuting Chen, Kepan Chen et al. "mRNA-based therapeutics: powerful and versatile tools to combat diseases", Signal Transduction and Targeted Therapy, 2022

49 words — < 1%

Crossref

20 Lindsey Wang, Pamela B. Davis, David C. Kaelber, Nora D. Volkow, Rong Xu. "Comparison of mRNA-1273 and BNT162b2 Vaccines on Breakthrough SARS-CoV-2 Infections, Hospitalizations, and Death During the Delta-Predominant Period", JAMA, 2022

46 words — < 1%

Crossref

21 Abid Hussain, Haiyin Yang, Mengjie Zhang, Qing Liu et al. "mRNA vaccines for COVID-19 and diverse diseases", Journal of Controlled Release, 2022

45 words — < 1%

Crossref

22 Maryam Bidram, Yue Zhao, Natalia G. Shebardina, Alexey V. Baldin et al. "mRNA-Based Cancer Vaccines: A Therapeutic Strategy for the Treatment of Melanoma Patients", Vaccines, 2021

43 words — < 1%

Crossref

23 [www.transit.dot.gov](http://www.transit.dot.gov)

Internet

43 words — < 1%

24 [clinicaltrials.gov](http://clinicaltrials.gov)

Internet

42 words — < 1%

25 Alexandros Papachristofilou, Madeleine M. Hipp, Ute Klinkhardt, Martin Früh et al. "Phase Ib evaluation of a self-adjuvanted protamine formulated mRNA-based active cancer immunotherapy, BI1361849 (CV9202), combined with local radiation treatment in patients with stage IV non-small cell lung cancer", Journal for ImmunoTherapy of Cancer, 2019

41 words — < 1%

- 
- 26 [www.frontiersin.org](http://www.frontiersin.org) 41 words — < 1%  
Internet
- 
- 27 Laith J. Abu-Raddad, Hiam Chemaitelly, Houssein H. Ayoub, Sawsan AlMukdad et al. "Effectiveness of BNT162b2 and mRNA-1273 COVID-19 boosters against SARS-CoV-2 Omicron (B.1.1.529) infection in Qatar", Cold Spring Harbor Laboratory, 2022 40 words — < 1%  
Crossref Posted Content
- 
- 28 [molecular-cancer.biomedcentral.com](http://molecular-cancer.biomedcentral.com) 40 words — < 1%  
Internet
- 
- 29 [trials.modernatx.com](http://trials.modernatx.com) 40 words — < 1%  
Internet
- 
- 30 C. Buddy Creech, Evan Anderson, Vladimir Berthaud, Inci Yildirim et al. "Evaluation of mRNA-1273 Covid-19 Vaccine in Children 6 to 11 Years of Age", New England Journal of Medicine, 2022 39 words — < 1%  
Crossref
- 
- 31 [www.sec.gov](http://www.sec.gov) 38 words — < 1%  
Internet
- 
- 32 [digitalcommons.wustl.edu](http://digitalcommons.wustl.edu) 37 words — < 1%  
Internet
- 
- 33 Meagan McMahon, George O'Dell, Jessica Tan, András Sárközy et al. "Assessment of a quadrivalent nucleoside-modified mRNA vaccine that protects against group 2 influenza viruses", Proceedings of the National Academy of Sciences, 2022 35 words — < 1%  
Crossref



|    |                                                                                                                                                                                       |                 |
|----|---------------------------------------------------------------------------------------------------------------------------------------------------------------------------------------|-----------------|
| 34 | <a href="https://link.springer.com">link.springer.com</a><br>Internet                                                                                                                 | 35 words — < 1% |
| 35 | <a href="https://pubmed.ncbi.nlm.nih.gov">pubmed.ncbi.nlm.nih.gov</a><br>Internet                                                                                                     | 35 words — < 1% |
| 36 | "Current Strategies in Cancer Gene Therapy",<br>Springer Science and Business Media LLC, 2016<br>Crossref                                                                             | 34 words — < 1% |
| 37 | Joseph A. Bellanti. "The long COVID syndrome: A<br>conundrum for the allergist/immunologist",<br>Allergy and Asthma Proceedings, 2022<br>Crossref                                     | 34 words — < 1% |
| 38 | <a href="http://www.carternr.com">www.carternr.com</a><br>Internet                                                                                                                    | 34 words — < 1% |
| 39 | <a href="https://adis.springer.com">adis.springer.com</a><br>Internet                                                                                                                 | 30 words — < 1% |
| 40 | Ayesha Zafar, Murtaza Hasan, Tuba Tariq, Zhifei<br>Dai. "Enhancing Cancer Immunotherapeutic<br>Efficacy with Sonotheranostic Strategies", Bioconjugate<br>Chemistry, 2021<br>Crossref | 29 words — < 1% |
| 41 | <a href="https://public4.pagefreezer.com">public4.pagefreezer.com</a><br>Internet                                                                                                     | 28 words — < 1% |
| 42 | Jennifer Abbasi. "Patients With Complete<br>Paralysis Walk With Spinal Cord Implant", JAMA,<br>2022<br>Crossref                                                                       | 27 words — < 1% |
| 43 | "AIDS Vaccine 2013 October 7–10, 2013<br>Barcelona, Spain", AIDS Research and Human                                                                                                   | 25 words — < 1% |

---

44 Vrinda Gote, Pradeep Kumar Bolla, Nagavendra Kommineni, Arun Butreddy et al. "A Comprehensive Review of mRNA Vaccines", International Journal of Molecular Sciences, 2023 25 words — < 1%  
Crossref

---

45 [changingtimes.media](https://www.changingtimes.media) 25 words — < 1%  
Internet

---

46 [ddrare.nibiohn.go.jp](https://ddrare.nibiohn.go.jp) 25 words — < 1%  
Internet

---

47 "Encyclopedic Reference of Genomics and Proteomics in Molecular Medicine", Springer Science and Business Media LLC, 2006 24 words — < 1%  
Crossref

---

48 Farhad Dastmalchi, Aida Karachi, Duane Mitchell, Maryam Rahman. "Dendritic Cell Therapy", Wiley, 2018 24 words — < 1%  
Crossref

---

49 Jiao Wei, Ai-Min Hui. "The paradigm shift in treatment from Covid-19 to oncology with mRNA vaccines", Cancer Treatment Reviews, 2022 24 words — < 1%  
Crossref

---

50 Meng - Zhen Yu, Nan - Nan Wang, Jia - Qing Zhu, Yao - Xin Lin. " The clinical progress and challenges of vaccines ", WIREs Nanomedicine and Nanobiotechnology, 2023 24 words — < 1%  
Crossref

---

51 Michael Attwaters. "Broad protection from a single flu vaccine", Nature Reviews Microbiology, 24 words — < 1%

- 
- 52 Qianling Ye, Yun Lin, Ruihao Li, Huaiji Wang, Chunyan Dong. "Recent advances of nanodrug delivery system in the treatment of hematologic malignancies", *Seminars in Cancer Biology*, 2022  
Crossref 23 words — < 1%
- 
- 53 [aacrjournals.org](http://aacrjournals.org)  
Internet 23 words — < 1%
- 
- 54 [investorshub.advfn.com](http://investorshub.advfn.com)  
Internet 23 words — < 1%
- 
- 55 [www.optometrytimes.com](http://www.optometrytimes.com)  
Internet 23 words — < 1%
- 
- 56 Cancer Immunotherapy Meets Oncology, 2014.  
Crossref 22 words — < 1%
- 
- 57 [globalresearchonline.net](http://globalresearchonline.net)  
Internet 22 words — < 1%
- 
- 58 [worldmedicinefoundation.com](http://worldmedicinefoundation.com)  
Internet 22 words — < 1%
- 
- 59 [www.bmj.com](http://www.bmj.com)  
Internet 22 words — < 1%
- 
- 60 Wilgenhof, S., A. M. T. Van Nuffel, D. Bentejn, J. Corthals, C. Aerts, C. Heirman, I. Van Riet, A. Bonehill, K. Thielemans, and B. Neyns. "A phase IB study on intravenous synthetic mRNA electroporated dendritic cell immunotherapy in pretreated advanced melanoma patients", *Annals of Oncology*, 2013.  
Crossref 21 words — < 1%
-

- 61 "Abstract", Cancer Investigation, 2003  
Crossref 20 words — < 1%
- 
- 62 Yuying Tian, Zhuoya Deng, Penghui Yang. "mRNA vaccines: A novel weapon to control infectious diseases", Frontiers in Microbiology, 2022  
Crossref 20 words — < 1%
- 
- 63 www.coursehero.com  
Internet 20 words — < 1%
- 
- 64 www.medrxiv.org  
Internet 20 words — < 1%
- 
- 65 G Ligat, R Cazal, S Hantz, S Alain. "The human cytomegalovirus terminase complex as an antiviral target: a close-up view", FEMS Microbiology Reviews, 2018  
Crossref 19 words — < 1%
- 
- 66 Mohamad-Gabriel Alameh, Drew Weissman, Norbert Pardi. "Chapter 202 Messenger RNA-Based Vaccines Against Infectious Diseases", Springer Science and Business Media LLC, 2020  
Crossref 19 words — < 1%
- 
- 67 Negar Firouzabadi, Parisa Ghasemiyeh, Fatemeh Moradishooli, Soliman Mohammadi-Samani. "Update on the effectiveness of COVID-19 vaccines on different variants of SARS-CoV-2", International Immunopharmacology, 2023  
Crossref 19 words — < 1%
- 
- 68 Satoshi Uchida, Federico Perche, Chantal Pichon, Horacio Cabral. "Nanomedicine-Based Approaches for mRNA Delivery", Molecular Pharmaceutics, 2020  
Crossref 19 words — < 1%

- 
- 69 Steffen Rausch, Christian Schwentner, Arnulf Stenzl, Jens Bedke. "mRNA vaccine CV9103 and CV9104 for the treatment of prostate cancer", Human Vaccines & Immunotherapeutics, 2014  
Crossref 19 words — < 1%
- 
- 70 [archive.org](#)  
Internet 19 words — < 1%
- 
- 71 [www.businesswire.com](#)  
Internet 19 words — < 1%
- 
- 72 [www.withpower.com](#)  
Internet 19 words — < 1%
- 
- 73 [www.mayoclinic.org](#)  
Internet 18 words — < 1%
- 
- 74 Carlton L Schwab, Diana P English, Dana M Roque, Monica Pasternak, Alessandro D Santin. "Past, present and future targets for immunotherapy in ovarian cancer", Immunotherapy, 2014  
Crossref 17 words — < 1%
- 
- 75 Paolo G.V. Martini, Lin T. Guey. "A New Era for Rare Genetic Diseases: Messenger RNA Therapy", Human Gene Therapy, 2019  
Crossref 17 words — < 1%
- 
- 76 Yang Wang, Ziqi Zhang, Jingwen Luo, Xuejiao Han, Yuquan Wei, Xiawei Wei. "mRNA vaccine: a potential therapeutic strategy", Molecular Cancer, 2021  
Crossref 17 words — < 1%
- 
- 77 [biomarkerres.biomedcentral.com](#)  
Internet 17 words — < 1%



|    |                                                                                                                                                                                                                                                      |                 |
|----|------------------------------------------------------------------------------------------------------------------------------------------------------------------------------------------------------------------------------------------------------|-----------------|
| 78 | <a href="http://ivr.cidrap.umn.edu">ivr.cidrap.umn.edu</a><br>Internet                                                                                                                                                                               | 17 words — < 1% |
| 79 | <a href="http://jhoonline.biomedcentral.com">jhoonline.biomedcentral.com</a><br>Internet                                                                                                                                                             | 17 words — < 1% |
| 80 | <a href="http://newdrugapprovals.org">newdrugapprovals.org</a><br>Internet                                                                                                                                                                           | 17 words — < 1% |
| 81 | <a href="http://www.researchsquare.com">www.researchsquare.com</a><br>Internet                                                                                                                                                                       | 17 words — < 1% |
| 82 | "Abstracts", Cancer Investigation, 2009<br>Crossref                                                                                                                                                                                                  | 16 words — < 1% |
| 83 | Abigail E. Powell, Kaiming Zhang, Mrinmoy Sanyal, Shaogeng Tang et al. "A Single Immunization with Spike-Functionalized Ferritin Vaccines Elicits Neutralizing Antibody Responses against SARS-CoV-2 in Mice", ACS Central Science, 2021<br>Crossref | 16 words — < 1% |
| 84 | Wenzhe Yu, Xiaoqian Hu, Bin Cao. "Viral Infections During Pregnancy: The Big Challenge Threatening Maternal and Fetal Health", Maternal-Fetal Medicine, 2022<br>Crossref                                                                             | 16 words — < 1% |
| 85 | <a href="http://budzianowski.eu">budzianowski.eu</a><br>Internet                                                                                                                                                                                     | 16 words — < 1% |
| 86 | <a href="http://encyclopedia.pub">encyclopedia.pub</a><br>Internet                                                                                                                                                                                   | 16 words — < 1% |
| 87 | <a href="http://jamanetwork.com">jamanetwork.com</a><br>Internet                                                                                                                                                                                     | 16 words — < 1% |
| 88 | <a href="http://patents.google.com">patents.google.com</a>                                                                                                                                                                                           |                 |

16 words — &lt; 1%

89 Michael J. Hogan, Norbert Pardi. "mRNA Vaccines in the COVID-19 Pandemic and Beyond", Annual Review of Medicine, 2021

Crossref

15 words — &lt; 1%

90 Perez-Cerda, C.. "Functional analysis of PCCB mutations causing propionic acidemia based on expression studies in deficient human skin fibroblasts", BBA - Molecular Basis of Disease, 20030520

Crossref

15 words — &lt; 1%

91 [www.meer.com](http://www.meer.com)

Internet

15 words — &lt; 1%

92 Yuebao Zhang, Changzhen Sun, Chang Wang, Katarina E. Jankovic, Yizhou Dong. "Lipids and Lipid Derivatives for RNA Delivery", Chemical Reviews, 2021

Crossref

14 words — &lt; 1%

93 [health.gov.on.ca](http://health.gov.on.ca)

Internet

14 words — &lt; 1%

94 [microbiologynote.com](http://microbiologynote.com)

Internet

14 words — &lt; 1%

95 [www.clinicaltrials.gov](http://www.clinicaltrials.gov)

Internet

14 words — &lt; 1%

96 [www.contagionlive.com](http://www.contagionlive.com)

Internet

14 words — &lt; 1%

97 "Abstracts", Molecular Genetics and Metabolism, 2019

Crossref

13 words — &lt; 1%

---

98 Brenda De Keersmaecker, Karel Fostier, Jurgen Corthals, Sofie Wilgenhof et al. 13 words — < 1%

"Immunomodulatory drugs improve the immune environment for dendritic cell-based immunotherapy in multiple myeloma patients after autologous stem cell transplantation", Cancer Immunology, Immunotherapy, 2014

[Crossref](#)

---

99 Enyue Fang, Xiaohui Liu, Miao Li, Zelun Zhang, Lifang Song, Baiyu Zhu, Xiaohong Wu, Jingjing Liu, Danhua Zhao, Yuhua Li. "Advances in COVID-19 mRNA vaccine development", Signal Transduction and Targeted Therapy, 2022 13 words — < 1%

[Crossref](#)

---

100 Justin C. Konje, Mariam Al Beloushi, Badreldeen Ahmed. "Immunisation against COVID-19 in Pregnancy and of Women Planning Pregnancy", Viruses, 2023 13 words — < 1%

[Crossref](#)

---

101 M. Schmidt, I. Vogler, E. Derhovanessian, T. Omokoko et al. "T-cell responses induced by an individualized neoantigen specific immune therapy in post (neo)adjuvant patients with triple negative breast cancer", 13 words — < 1%

Annals of Oncology, 2020

[Crossref](#)

---

102 Peng Zhang, Elisabeth Narayanan, Qingbo Liu, Yaroslav Tsybovsky et al. "A multiclade env-gag VLP mRNA vaccine elicits tier-2 HIV-1-neutralizing antibodies and reduces the risk of heterologous SHIV infection in macaques", Nature Medicine, 2021 13 words — < 1%

[Crossref](#)

---

103 bdrc.tums.ac.ir 13 words — < 1%

[Internet](#)

---

104 [science.sciencemag.org](https://science.sciencemag.org)

13 words — &lt; 1%

---

105 Juan José Hernando, Tjoung-Won Park, Hans-Peter Fischer, Oliver Zivanovic et al. "Vaccination with dendritic cells transfected with mRNA-encoded folate-receptor- $\alpha$  for relapsed metastatic ovarian cancer", *The Lancet Oncology*, 2007  
Crossref

---

106 Maximiliano L. Cacicedo, María José Limeres, Stephan Gehring. "mRNA-Based Approaches to Treating Liver Diseases", *Cells*, 2022  
Crossref

---

107 [iopscience.iop.org](https://iopscience.iop.org)  
Internet

---

108 [pages.cs.wisc.edu](https://pages.cs.wisc.edu)  
Internet

---

109 [ultrarareadvocacy.com](https://ultrarareadvocacy.com)  
Internet

---

110 [upcommons.upc.edu](https://upcommons.upc.edu)  
Internet

---

111 [www.nhlbi.nih.gov](https://www.nhlbi.nih.gov)  
Internet

---

112 [www.pharmaceutical-technology.com](https://www.pharmaceutical-technology.com)  
Internet

---

113 Lei Miao, Yu Zhang, Leaf Huang. "mRNA vaccine for cancer immunotherapy", *Molecular Cancer*, 2021  
Crossref

---

|     |                                                                                                                                                                                                                                                                                                |                 |
|-----|------------------------------------------------------------------------------------------------------------------------------------------------------------------------------------------------------------------------------------------------------------------------------------------------|-----------------|
| 114 | Sebastian M. Castillo-Hair, Georg Seelig.<br>"Machine Learning for Designing Next-Generation<br>mRNA Therapeutics", Accounts of Chemical Research, 2021<br><small>Crossref</small>                                                                                                             | 11 words — < 1% |
| 115 | Ying Du. "Down-regulation of miR-141 in gastric<br>cancer and its involvement in cell growth",<br>Journal of Gastroenterology, 04/11/2009<br><small>Crossref</small>                                                                                                                           | 11 words — < 1% |
| 116 | <a href="http://ashpublications.org">ashpublications.org</a><br><small>Internet</small>                                                                                                                                                                                                        | 11 words — < 1% |
| 117 | Megumi Nishitani Yukuyama. "Repositioning<br>study of flubendazole for treating lung cancer<br>and meningoencephalitis using an oral lipid nanosystem",<br>Universidade de Sao Paulo, Agencia USP de Gestao da<br>Informacao Academica (AGUIA), 2023<br><small>Crossref Posted Content</small> | 10 words — < 1% |
| 118 | Robert A. Belderbos, Joachim G.J.V. Aerts, Heleen<br>Vroman. "Enhancing Dendritic Cell Therapy in<br>Solid Tumors with Immunomodulating Conventional<br>Treatment", Molecular Therapy - Oncolytics, 2019<br><small>Crossref</small>                                                            | 10 words — < 1% |
| 119 | <a href="http://cyprusjmedsci.com">cyprusjmedsci.com</a><br><small>Internet</small>                                                                                                                                                                                                            | 10 words — < 1% |
| 120 | <a href="http://nccrd.iitm.ac.in">nccrd.iitm.ac.in</a><br><small>Internet</small>                                                                                                                                                                                                              | 10 words — < 1% |
| 121 | <a href="http://tessera.spandidos-publications.com">tessera.spandidos-publications.com</a><br><small>Internet</small>                                                                                                                                                                          | 10 words — < 1% |
| 122 | <a href="http://www.centerwatch.com">www.centerwatch.com</a><br><small>Internet</small>                                                                                                                                                                                                        | 10 words — < 1% |



- 123 [www.lecturio.com](http://www.lecturio.com) 10 words — < 1%  
Internet
- 
- 124 [www.mcmasterforum.org](http://www.mcmasterforum.org) 10 words — < 1%  
Internet
- 
- 125 "POSTER PRESENTATIONS", BJOG An International Journal of Obstetrics & Gynaecology, 09/2008 9 words — < 1%  
Crossref
- 
- 126 De - feng Li, Qi - song Liu, Mei - feng Yang, Hao - ming Xu et al. " Nanomaterials for - based Therapeutics: Challenges and Opportunities ", Bioengineering & Translational Medicine, 2023 9 words — < 1%  
Crossref
- 
- 127 Diana O. Lopez-Cantu, Xichi Wang, Hector Carrasco-Magallanes, Samson Afewerki et al. "From Bench to the Clinic: The Path to Translation of Nanotechnology-Enabled mRNA SARS-CoV-2 Vaccines", Nano-Micro Letters, 2022 9 words — < 1%  
Crossref
- 
- 128 Elena Mitsi, Mariana Diniz, Jesus Reine, Andrea Collins et al. "Long-term respiratory mucosal immune memory to SARS-CoV-2 after infection and vaccination", Research Square Platform LLC, 2023 9 words — < 1%  
Crossref Posted Content
- 
- 129 Emily De Lombaerde, Olivier De Wever, Bruno G. De Geest. "Delivery routes matter: Safety and efficacy of intratumoral immunotherapy", Biochimica et Biophysica Acta (BBA) - Reviews on Cancer, 2021 9 words — < 1%  
Crossref
- 
- 130 J. P. Kraus. "Mutation analysis in 54 propionic acidemia patients", Journal of Inherited Metabolic 9 words — < 1%

|     |                                                                                                                                                                                                 |                |
|-----|-------------------------------------------------------------------------------------------------------------------------------------------------------------------------------------------------|----------------|
| 131 | <a href="http://bmcproc.biomedcentral.com">bmcproc.biomedcentral.com</a><br>Internet                                                                                                            | 9 words — < 1% |
| 132 | <a href="http://esot.org">esot.org</a><br>Internet                                                                                                                                              | 9 words — < 1% |
| 133 | <a href="http://healthdocbox.com">healthdocbox.com</a><br>Internet                                                                                                                              | 9 words — < 1% |
| 134 | <a href="http://pure.port.ac.uk">pure.port.ac.uk</a><br>Internet                                                                                                                                | 9 words — < 1% |
| 135 | <a href="http://translational-medicine.biomedcentral.com">translational-medicine.biomedcentral.com</a><br>Internet                                                                              | 9 words — < 1% |
| 136 | <a href="http://www.freeradicals2013.de">www.freeradicals2013.de</a><br>Internet                                                                                                                | 9 words — < 1% |
| 137 | <a href="http://www.omicsonline.org">www.omicsonline.org</a><br>Internet                                                                                                                        | 9 words — < 1% |
| 138 | <a href="http://www.scilit.net">www.scilit.net</a><br>Internet                                                                                                                                  | 9 words — < 1% |
| 139 | Ding An, Andrea Frassetto, Eric Jacquinet, Marianne Eybye et al. "Long-term efficacy and safety of mRNA therapy in two murine models of methylmalonic acidemia", EBioMedicine, 2019<br>Crossref | 8 words — < 1% |
| 140 | F Ren. "Hepatitis C virus infection upregulates expression of the type I interferon receptor in human peripheral blood mononuclear cells", Hepatology Research, 2003<br>Crossref                | 8 words — < 1% |

---

141 Geonhee Han, Dahye Noh, Hokyung Lee, Sangmin Lee, Sehoon Kim, Hong Yeol Yoon, Soo Hyeon Lee. "Advances in mRNA Therapeutics for Cancer Immunotherapy: From Modification to Delivery", Advanced Drug Delivery Reviews, 2023

8 words — < 1%

Crossref

---

142 Gina M. Mantia-Smaldone, Christina S. Chu. "A Review of Dendritic Cell Therapy for Cancer: Progress and Challenges", BioDrugs, 2013

8 words — < 1%

Crossref

---

143 Hitomi Sano, Kazushige Nagai, Hiroyuki Tsutsumi, Yoshio Kuroki. "Lactoferrin and surfactant protein A exhibit distinct binding specificity to F protein and differently modulate respiratory syncytial virus infection", European Journal of Immunology, 2003

8 words — < 1%

Crossref

---

144 Jennifer Cable, Barney S. Graham, Richard A. Koup, Robert A. Seder et al. "Progress in vaccine development for infectious diseases—a Keystone Symposia report", Annals of the New York Academy of Sciences, 2023

8 words — < 1%

Crossref

---

145 Lauren A. Austin, Jeffrey S. Smith, Debbie D. Nahas, Andrew Danzinger et al. "Split-Dose Administration Enhances Immune Responses Elicited by a mRNA/Lipid Nanoparticle Vaccine Expressing Respiratory Syncytial Virus F Protein", Molecular Pharmaceutics, 2022

8 words — < 1%

Crossref

---

146 Lingeng Lu, Wenxue Ma, Caroline H. Johnson, Sajid A. Khan, Melinda L. Irwin, Lajos Pusztai. "In silico designed mRNA vaccines targeting CA-125 neoantigen in breast and ovarian cancer", Vaccine, 2023

8 words — < 1%

Crossref

---

147 Martin Sebastian, Andreas Schröder, Birgit Scheel, Henoch S. Hong et al. "A phase I/IIa study of the mRNA-based cancer immunotherapy CV9201 in patients with stage IIIB/IV non-small cell lung cancer", Cancer Immunology, Immunotherapy, 2019 8 words — < 1%

[Crossref](#)

---

148 Neeraj K. Chauhan, Madhu Vajpayee, Kamalika Mojumdar, Ravinder Singh, Alpana Singh. "Study of CD4+CD8+ Double positive T-lymphocyte phenotype and function in Indian patients infected with HIV-1", Journal of Medical Virology, 2012 8 words — < 1%

[Crossref](#)

---

149 Omna Sharma, Ali A. Sultan, Hong Ding, Chris R. Triggie. "A Review of the Progress and Challenges of Developing a Vaccine for COVID-19", Frontiers in Immunology, 2020 8 words — < 1%

[Crossref](#)

---

150 Pan Huang, Lujia Sun, Jinhao Li, Qingyi Wu, Nima Rezaei, Shibo Jiang, Chungun Pan. "Potential cross-species transmission of highly pathogenic avian influenza H5 subtype (HPAI H5) viruses to humans calls for the development of H5-specific and universal influenza vaccines", Cell Discovery, 2023 8 words — < 1%

[Crossref](#)

---

151 Patrick J Stiff, Cheryl Czerlanis, Maureen L Drakes. "Dendritic cell immunotherapy in ovarian cancer", Expert Review of Anticancer Therapy, 2014 8 words — < 1%

[Crossref](#)

---

152 Tushar Baviskar, Dezaree Raut, Lokesh Kumar Bhatt. "Deciphering Vaccines for COVID-19: Where 8 words — < 1%

- 
- 153 Vaishali A. Walke, E. Jayashankar, T. Karuna, Jai Kumar Chourasia, Hemlata Panwar, Neelkamal Kapoor, Vikas Gupta, Sarman Singh. "Invasive Mixed Fungal Disease after COVID-19: A Series of Seven Cases", Journal of Laboratory Physicians, 2023  
Crossref 8 words — < 1%
- 
- 154 Van Cutsem, E.. "Expert opinion on management of gastric and gastro-oesophageal junction adenocarcinoma on behalf of the European Organisation for Research and Treatment of Cancer (EORTC) - gastrointestinal cancer group", European Journal of Cancer, 200801  
Crossref 8 words — < 1%
- 
- 155 academic.oup.com  
Internet 8 words — < 1%
- 
- 156 annalsofintensivecare.springeropen.com  
Internet 8 words — < 1%
- 
- 157 data.cityofchicago.org  
Internet 8 words — < 1%
- 
- 158 eprints.gla.ac.uk  
Internet 8 words — < 1%
- 
- 159 theses.bham.ac.uk  
Internet 8 words — < 1%
- 
- 160 fda.report  
Internet 8 words — < 1%
- 
- 161 vdoc.pub  
Internet

8 words — < 1%

162 [www.iavi.org](http://www.iavi.org)  
Internet

8 words — < 1%

163 [www.unicef.org](http://www.unicef.org)  
Internet

8 words — < 1%

164 Emma K. Accorsi, Amadea Britton, Katherine E. Fleming-Dutra, Zachary R. Smith et al. "Association Between 3 Doses of mRNA COVID-19 Vaccine and Symptomatic Infection Caused by the SARS-CoV-2 Omicron and Delta Variants", JAMA, 2022  
Crossref

7 words — < 1%

165 Fotin-Mleczek, Mariola, Kai Zanzinger, Regina Heidenreich, Christina Lorenz, Aleksandra Kowalczyk, Karl-Josef Kallen, and Stephan M Huber. "mRNA-based vaccines synergize with radiation therapy to eradicate established tumors", Radiation Oncology, 2014.  
Crossref

7 words — < 1%

166 G. M. Eliopoulos, M. Shardell, A. D. Harris, S. S. El-Kamary, J. P. Furuno, R. R. Miller, E. N. Perencevich. "Statistical Analysis and Application of Quasi Experiments to Antimicrobial Resistance Intervention Studies", Clinical Infectious Diseases, 2007  
Crossref

7 words — < 1%

167 Mario Turriziani, Massimo Fantini, Monica Benvenuto, Valerio Izzi et al. "Carcinoembryonic Antigen (CEA)-Based Cancer Vaccines: Recent Patents and Antitumor Effects from Experimental Models to Clinical Trials", Recent Patents on Anti-Cancer Drug Discovery, 2012  
Crossref

7 words — < 1%



168 Mariola Fotin-Mleczek, Katharina M. Duchardt, Christina Lorenz, Regina Pfeiffer et al. "Messenger RNA-based Vaccines With Dual Activity Induce Balanced TLR-7 Dependent Adaptive Immune Responses and Provide Antitumor Activity", Journal of Immunotherapy, 2011

7 words — < 1%

Crossref

169 Pengfei Sun, Xiaosheng Lu, Chao Xu, Wenjuan Sun, Bo Pan. "Understanding of COVID - 19 based on current evidence", Journal of Medical Virology, 2020

7 words — < 1%

Crossref

170 Sudha Chivukula, Timothy Plitnik, Timothy Tibbitts, Shrirang Karve et al. "Development of multivalent mRNA vaccine candidates for seasonal or pandemic influenza", npj Vaccines, 2021

7 words — < 1%

Crossref

171 Agnese Gugliandolo, Luigia Fonticoli, Oriana Trubiani, Thangavelu S. Rajan et al. "Oral Bone Tissue Regeneration: Mesenchymal Stem Cells, Secretome, and Biomaterials", International Journal of Molecular Sciences, 2021

6 words — < 1%

Crossref

172 Annkristin Heine, Stefan Juranek, Peter Brossart. "Clinical and immunological effects of mRNA vaccines in malignant diseases", Molecular Cancer, 2021

6 words — < 1%

Crossref

173 Barbara Stillwater. "The Alaska Native Women's Wellness Project", Health Care for Women International, 2010

6 words — < 1%

Crossref

174 Duaa W Al-Sadeq, Farah M Shurrab, Ahmed Ismail, Fathima Humaira Amanullah et al. "Comparison of antibody immune responses between BNT162b2 and mRNA-

6 words — < 1%

1273 SARS-CoV-2 vaccines in naïve and previously infected individuals", Journal of Travel Medicine, 2021

Crossref

---

175 Qi Wang, Chunxia Su, Caicun Zhou. "Recent advances in immunotherapy for lung cancer", Cancer Innovation, 2023 6 words — < 1%  
Crossref

---

176 Yanina Jansen, Vibeke Kruse, Jurgen Corthals, Kelly Schats et al. "A randomized controlled phase II clinical trial on mRNA electroporated autologous monocyte-derived dendritic cells (TriMixDC-MEL) as adjuvant treatment for stage III/IV melanoma patients who are disease-free following the resection of macrometastases", Cancer Immunology, Immunotherapy, 2020 6 words — < 1%  
Crossref

---

177 pure.rug.nl 6 words — < 1%  
Internet

---

178 strathprints.strath.ac.uk 6 words — < 1%  
Internet

---

EXCLUDE QUOTES ON  
EXCLUDE BIBLIOGRAPHY ON

EXCLUDE SOURCES OFF  
EXCLUDE MATCHES OFF
